# Supplementary material for: Excitatory synapses and gap junctions cooperate to improve Pv neuronal burst firing and cortical social cognition in Shank2-mutant mice
Source: PubMed Central journal article supplement (PMC8387434; doi:10.1038/s41467-021-25356-2), 2021-08-25
Supplement: 41467_2021_25356_MOESM1_ESM.pdf [file 41467_2021_25356_MOESM1_ESM.pdf]

## Supplementary Information

### Excitatory synapses and gap junctions cooperate to improve Pv neuronal burst firing and cortical social cognition in *Shank2*-mutant mice

Eunee Lee,<sup>1,2,\*</sup> Seungjoon Lee,<sup>3,\*</sup> Jae Jin Shin,<sup>4,5,\*</sup> Woochul Choi,<sup>6,\*</sup> Changuk Chung,<sup>1</sup> Suho Lee,<sup>3</sup> Jihye Kim,<sup>1</sup> Seungmin Ha,<sup>1</sup> Ryunhee Kim,<sup>1</sup> Taesun Yoo,<sup>1</sup> Ye-Eun Yoo,<sup>3</sup> Jisoo Kim,<sup>3</sup> Young Woo Noh,<sup>3</sup> Issac Rhim,<sup>1</sup> Soo Yeon Lee,<sup>3</sup> Woohyun Kim,<sup>3</sup> Taekyung Lee,<sup>1</sup> Hyogeun Shin,<sup>5</sup> Il-Joo Cho,<sup>7</sup> Karl Deisseroth,<sup>8</sup> Sang Jeong Kim,<sup>4</sup> Joo Min Park,<sup>5,#</sup> Min Whan Jung,<sup>1,3,#</sup> Se-Bum Paik,<sup>6,#</sup> and Eunjoon Kim<sup>1,3,#</sup>

<sup>1</sup>Center for Synaptic Brain Dysfunctions, Institute for Basic Science (IBS), Daejeon 34141, Korea; <sup>2</sup>Dept. of Anatomy, College of Medicine, Yonsei University, Seoul; <sup>3</sup>Department of Biological Sciences, KAIST, Daejeon 34141, Korea; <sup>4</sup>Department of Brain and Cognitive Science, College of Natural Science, Seoul National University, Seoul 08826, Korea; <sup>5</sup>Center for Cognition and Sociality, Institute for Basic Science (IBS), Daejeon, Korea; <sup>6</sup>Program of Brain and Cognitive Engineering, Department of Bio and Brain Engineering, Korea Advanced Institute for Science and Technology (KAIST), Daejeon 34141, Korea; <sup>7</sup>Center for BioMicrosystems, Brain Science Institute, Korea Institute of Science and Technology (KIST), Seoul, Korea; <sup>8</sup>Department of Bioengineering, Department of Psychiatry and Behavioral Sciences, Howard Hughes Medical Institute, Stanford University, Stanford, CA 94305, USA; \*These authors contributed equally to the work; #Corresponding authors.

### Supplementary figure legends

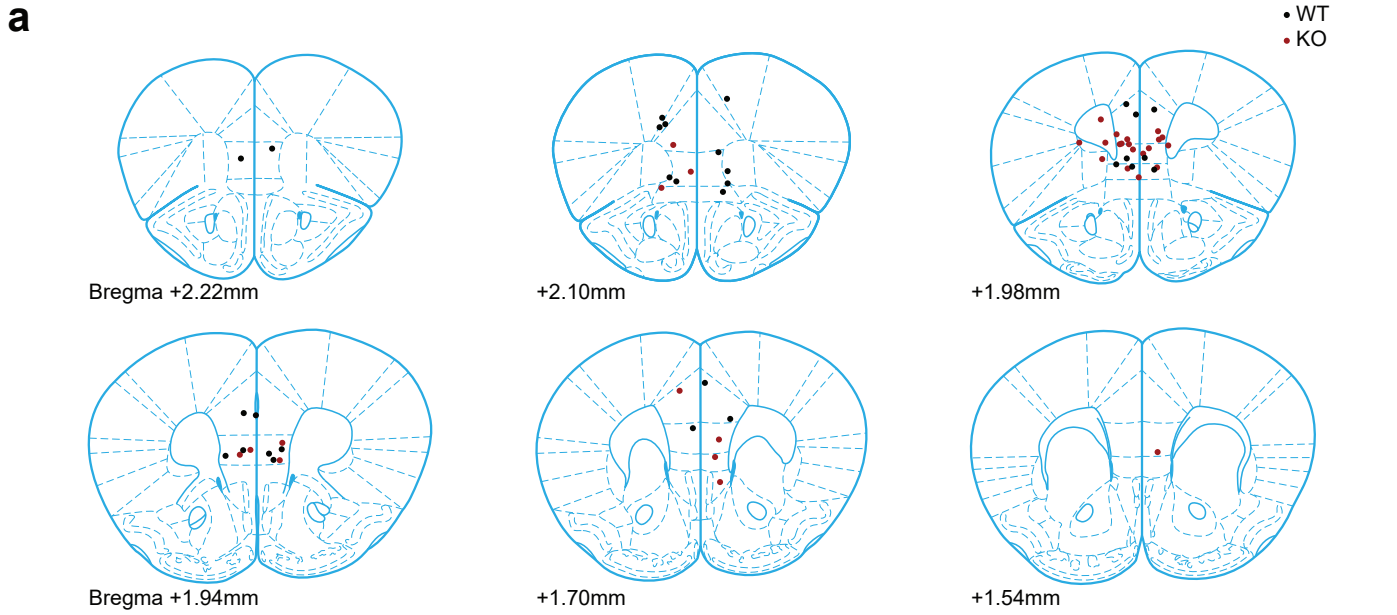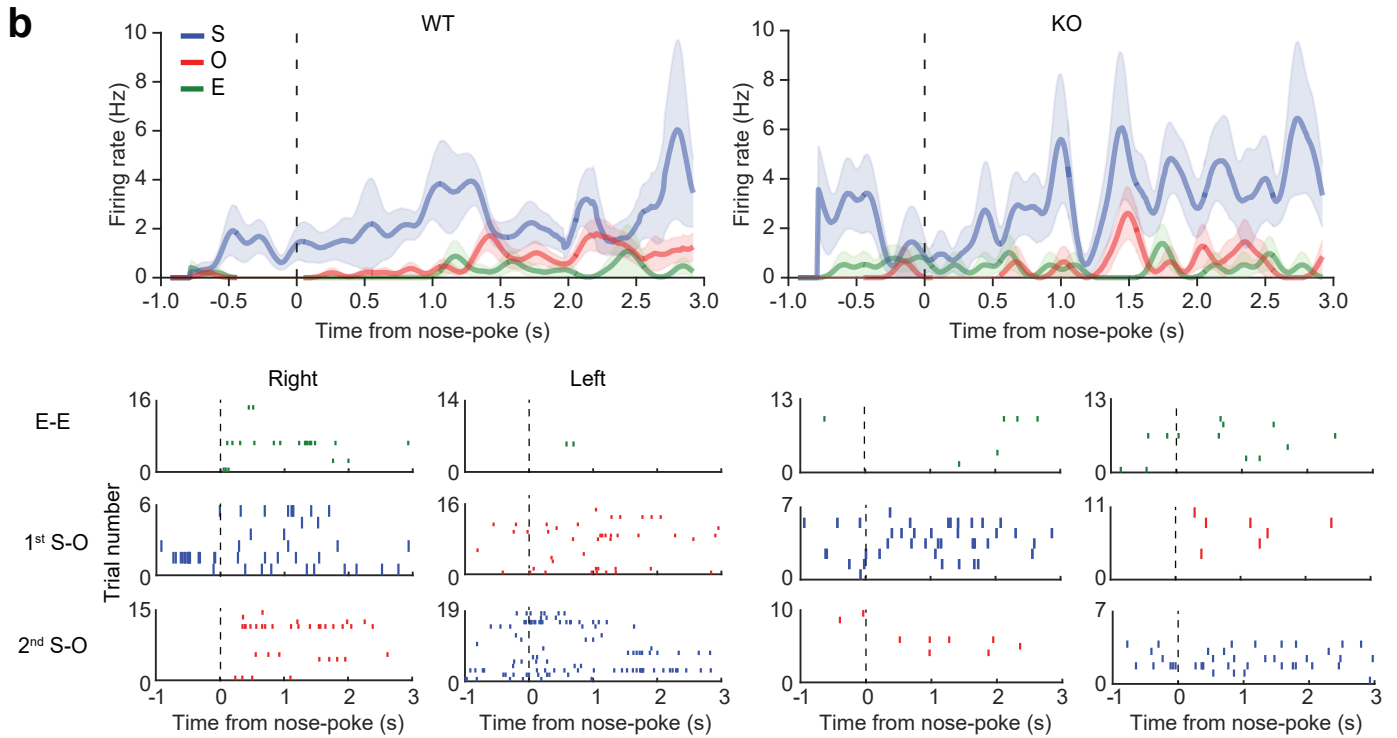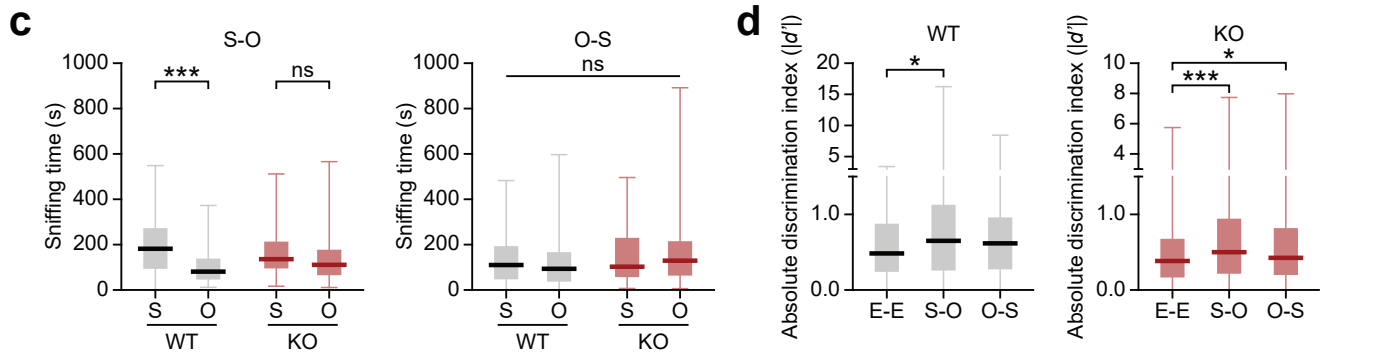

**Supplementary figure 1. Positions of single-unit tetrode tips and examples of WT and *Shank2*<sup>-/-</sup> mPFC neurons that show target-specific or broadly-tuned neuronal firings.**

(a) Positions of single-unit tetrode tips in mPFC regions.

(b) Examples of neurons in the mPFC of WT and *Shank2*<sup>-/-</sup> mice that show target-specific or broadly-tuned discharges. S, social; O, object; E, empty.

(c) Social and object target explorations in the first and second S-O session in the linear chamber, as shown by nose-poke time. Data: minimal, maximal, median, 25%, and 75% values. Data: mean ± SEM. (n = 56 experiments with 5 mice [WT] and 60, 5 [KO], \*\*\*p < 0.001, ns, not significant, two-way repeated-measures ANOVA).

(d) Discriminative neuronal responses for target pairs in the E-E, first S-O, and second S-O sessions, as shown by the discrimination index ( $d'$ ; absolute values without consideration of response directions)<sup>1,2</sup>. Data: minimal, maximal, median, 25%, and 75% values. Data: mean ± SEM. (n = 293 neurons from 5 mice [WT] and 386, 5 [KO], \*p < 0.05, \*\*\*p < 0.001, Friedman test with Dunn's multiple comparison).

See Source Data for raw data values and Supplementary Table 1 for statistical details.

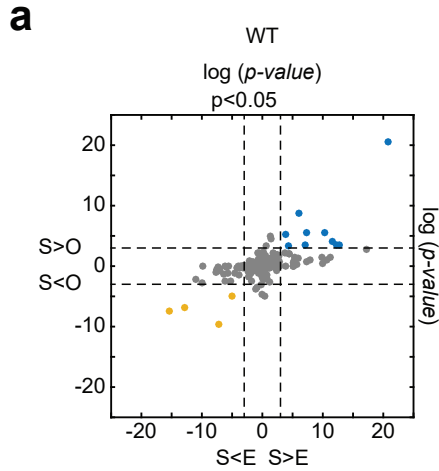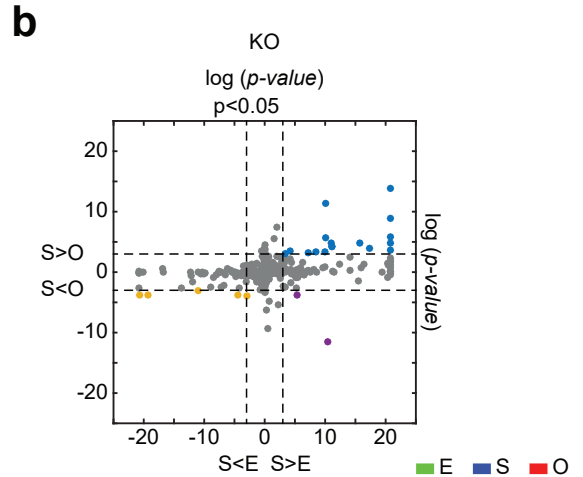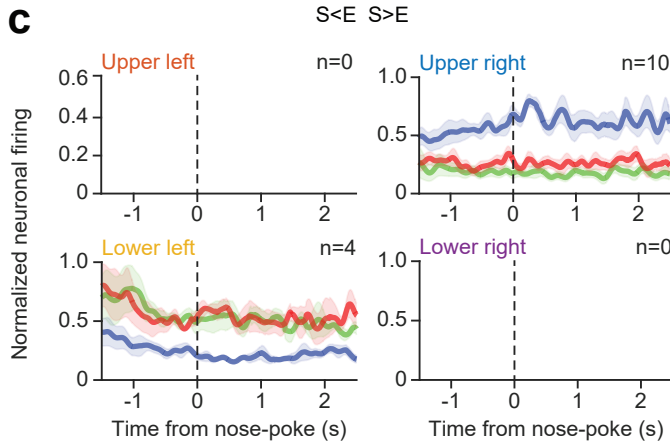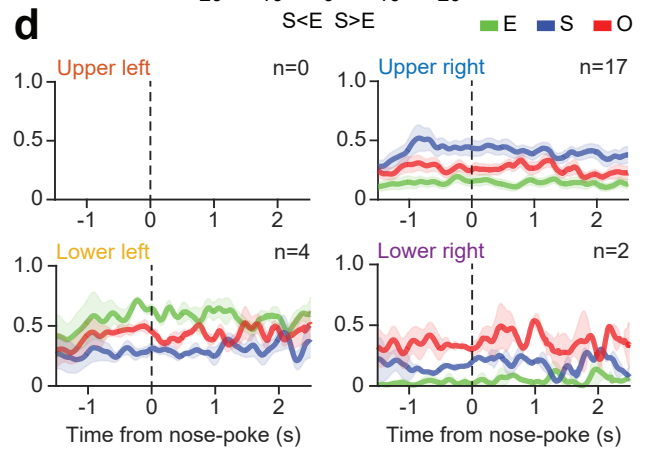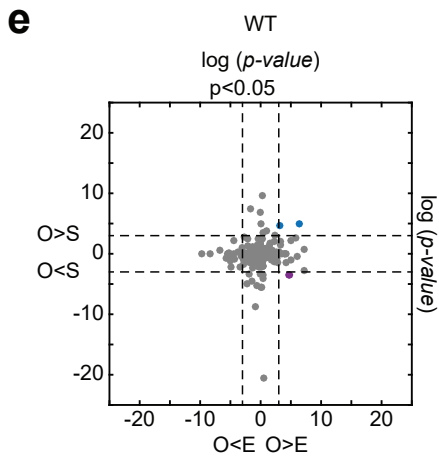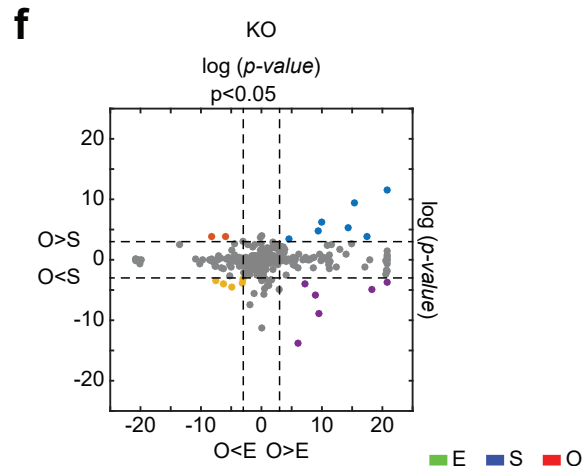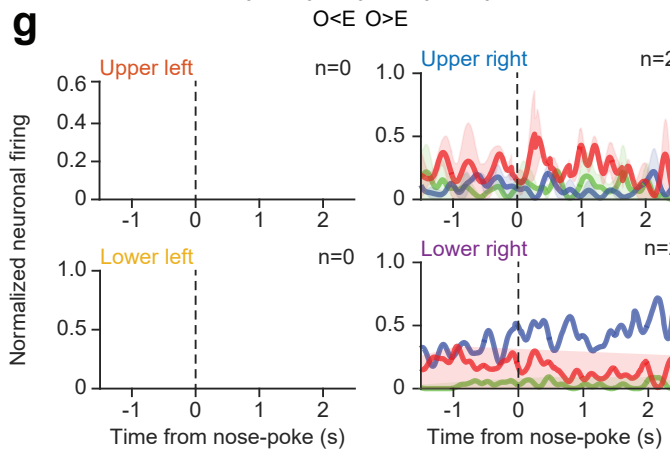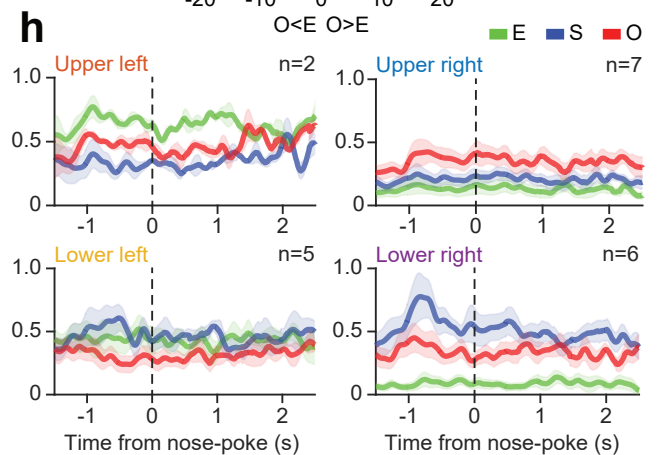



**Supplementary figure 2. Discharge patterns of WT and *Shank2*<sup>-/-</sup> mPFC neurons grouped according to their discriminative discharges to S-O and S-E, or O-S and O-E, target contexts.**

(a–d) Two-dimensional plots of p-values for the discrimination of S-O and S-E pairs of target contexts (or target pairs, in short) by total neurons (a and b; n = 293 and 429 neurons from WT and KO, respectively). Data: mean ± SEM. P-values for discriminative discharges for specific target pairs were determined by two-way ANOVA, as described previously (Lee et al., 2016). Dotted lines in panels a and b indicate p = 0.05 (two-way ANOVA with Tukey's test). Panels c and d indicate averaged discharges of all neurons that significantly (p < 0.05) discriminated specific target pairs plotted against the time window encompassing nose poke (number of neurons are indicated). Shading indicates standard error of the mean (SEM).

(e–h) Two-dimensional plots of p-values for the discrimination of O-S and O-E target pairs by total neurons (a and b; n = 293 and 439 neurons from WT and KO, respectively). Data: mean ± SEM. Averaged discharges of all neurons that significantly (p < 0.05; two-way ANOVA with Tukey's test) discriminated specific target sets plotted against the time window encompassing nose poke (c and d; numbers of neurons are indicated).

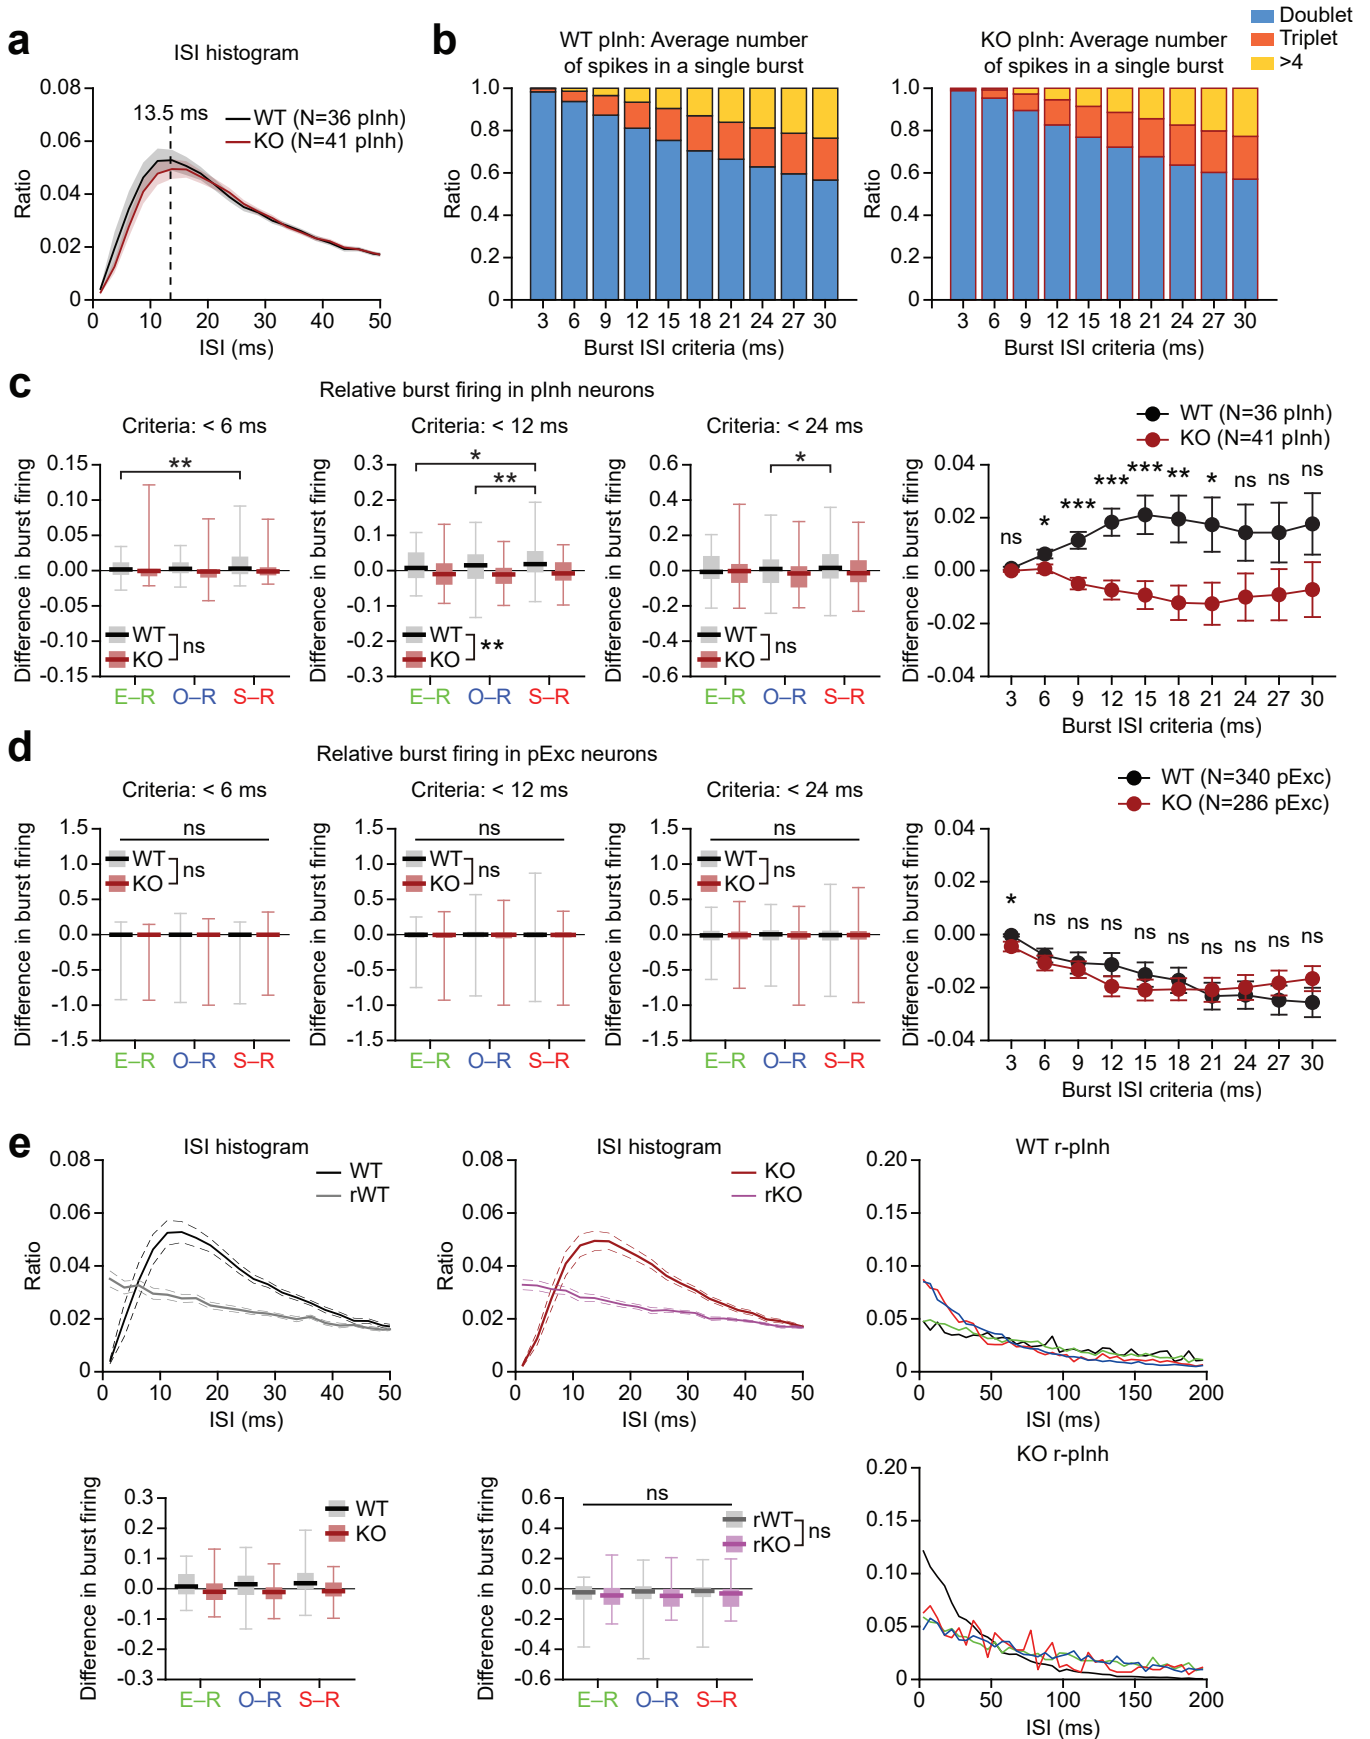

**Supplementary figure 3. Burst firing profile of WT and *Shank2*<sup>-/-</sup> plnh neurons.**

(a) ISI histograms of WT and KO (*Shank2*<sup>-/-</sup>) plnh neurons (black: WT, red: KO). Note that the two distributions of ISIs peak at 13.5 ms, forming the basis for the definition of burst firing as consecutive spikes with ISI < 12 ms.

(b) Number of spikes in each burst using various thresholds of burst definition. Note that as the ISI threshold of a burst increases, the number of spikes in each burst increases and that large portions (~60–80%) of the bursts across different thresholds, including 12 ms, contain two consecutive spikes.

(c) Bar graphs for  $\Delta$ burst firing (changes in high-frequency burst firings during S/O/E target encounter relative to the R state) for E, O, and S in WT and KO plnh neurons, with different burst thresholds. Note that levels of  $\Delta$ burst firing are always higher in WT than KO plnh neurons with three different burst thresholds (ISI < 6 ms, 12 ms, and 24 ms are shown as examples). Note also that the average difference in  $\Delta$ burst firing between WT and KO were significant in the ISI threshold range of 6-21 ms, as shown by the genotype differences at each ISI thresholds (graph on the right). Data: minimal, maximal, median, 25%, and 75% values. Data: mean  $\pm$  SEM. (n = 36 neurons [WT] and 41 [KO], two-way ANOVA with Tukey's test [left three graphs]).

(d) Same as C, but for pExc neurons. Note that different ISI thresholds for bursts did not lead to significant differences in  $\Delta$ burst firing between KO and WT pExc neurons. Data: minimal, maximal, median, 25%, and 75% values. Data: mean  $\pm$  SEM. (n = 340 neurons [WT] and 286 [KO], two-way ANOVA with Tukey's test [left three graphs]).

(e) Shuffling spike times eliminates  $\Delta$ burst firing differences across targets in plnh neurons. rWT/KO, random shuffling in WT/KO. Data: minimal, maximal, median, 25%, and 75% values. Data: mean  $\pm$  SEM. (n = 340 neurons [WT] and 286 [KO], two-way ANOVA with Tukey's test).

See Source Data for raw data values and Supplementary Table 1 for statistical details.

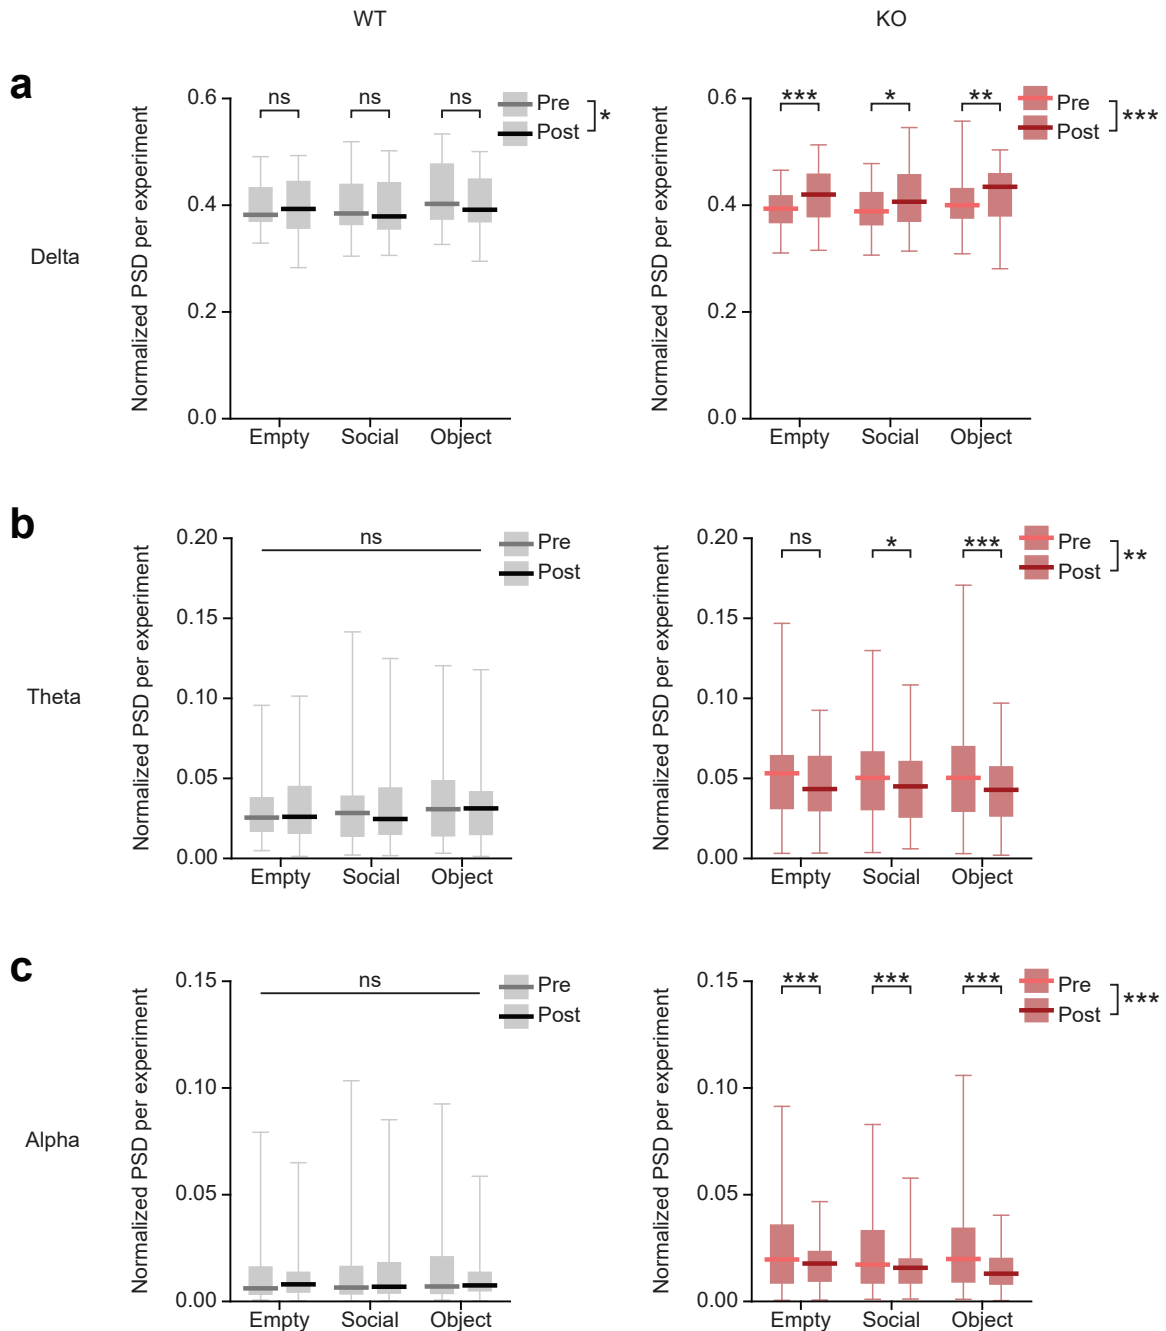

**Supplementary figure 4. Changes in the spectral powers of target-induced oscillations in delta, theta, and alpha ranges in the *Shank2*<sup>-/-</sup> mPFC.**

(a–c) Quantification of the temporal changes in oscillatory activities in the *Shank2*<sup>-/-</sup> mPFC, using spectral power densities before and after nose poke (-1.5 to -0.5 sec and 0.5 to 1.5 sec, respectively). Data: minimal, maximal, median, 25%, and 75% values. Data: mean ± SEM. (n = 52 experiments from 5 WT mice, and 53 experiments from 5 *Shank2*<sup>-/-</sup> mice, \*p < 0.05, \*\*p < 0.01, \*\*\*p < 0.001, ns, not significant, two-way ANOVA with Tukey's test).

See Source Data for raw data values and Supplementary Table 1 for statistical details.

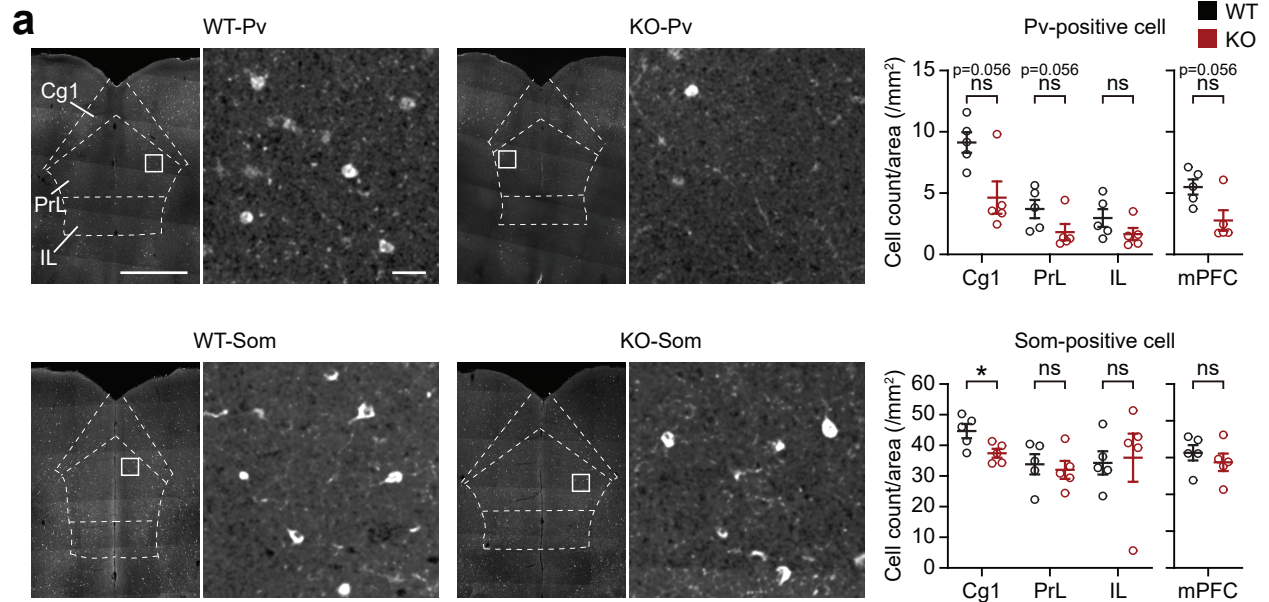

**Supplementary figure 5. Normal Pv neuronal density in the *Shank2*<sup>-/-</sup> mPFC.**

(a) Normal density of Pv- and somatostatin/Som-positive neurons in the *Shank2*<sup>-/-</sup> mPFC, although there is a tendency for a decrease for Pv neurons, as shown by the density of Pv/Som-positive neurons normalized to the indicated subregions of the mPFC (anterior cingular [Cg1], prelimbic [PrL], and infralimbic [IL]). The relative densities of Pv and Som neurons could vary depending the affinity of the antibodies used, although a previous study has reported that Pv and Som neurons comprise ~40% and 30% of neocortical interneurons<sup>3</sup>. Scale bar, 1 mm and 50  $\mu$ m. Data: minimal, maximal, median, 25%, and 75% values. Data: mean  $\pm$  SEM. (n = 33 slices from 5 mice [WT-PV], 36/5 [KO-PV], 33/5 [WT-SST], 36/5 [KO-SST], ns, not significant, Mann-Whitney test and Student's t-test depending the normality of data distribution).

See Source Data for raw data values and Supplementary Table 1 for statistical details.

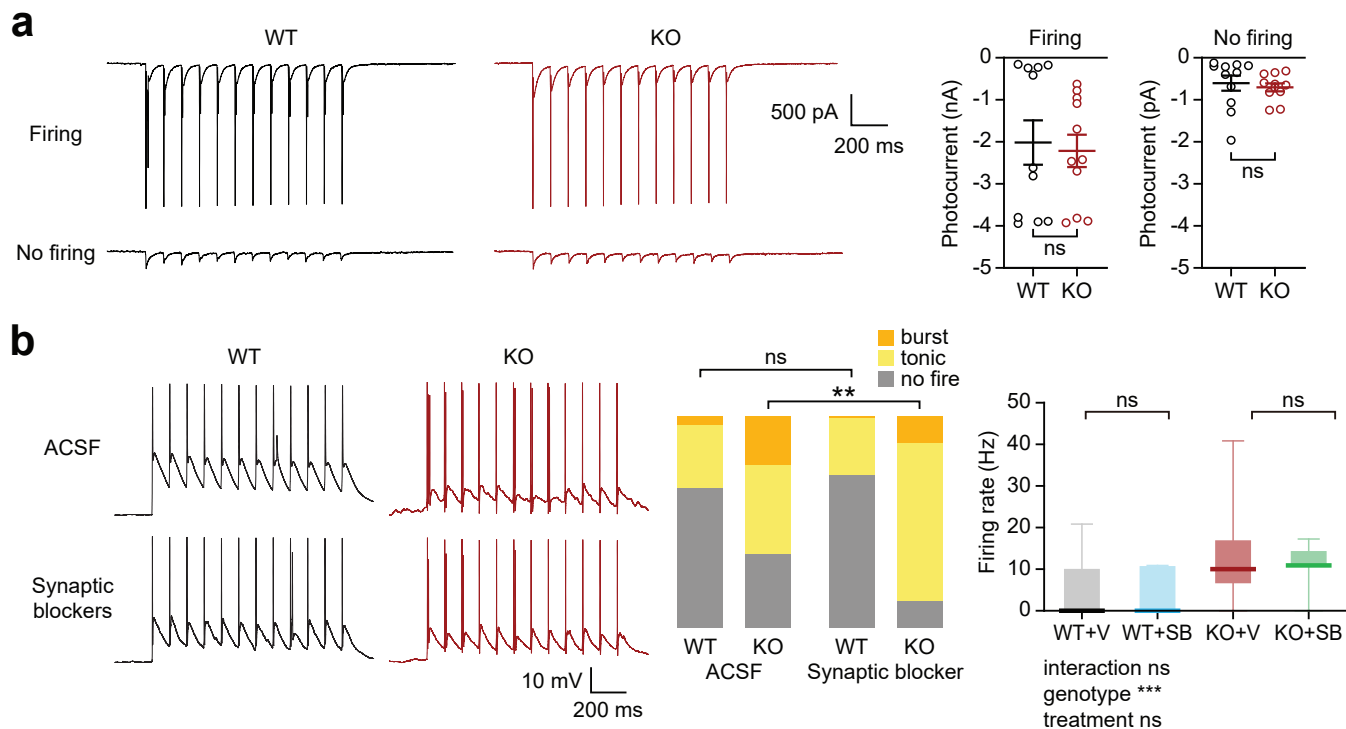

**Supplementary figure 6. Comparable photocurrents in WT and *Shank2*<sup>-/-</sup> P<sub>v</sub> neurons, and minimal effects of synaptic blockade on the WT-KO difference in burst firing.**

(a) Comparable photocurrents recorded in P<sub>v</sub> neurons directly light-stimulated in voltage-clamp recordings (-70 mV) in WT and *Shank2*<sup>-/-</sup> with in the presence/absence of induced firings. (n = 11 neurons from 3 mice [WT and KO with firing], 11 neurons from 3 mice [WT and KO without firing], ns, not significant, Mann Whitney test [with firing], Student's t-test [without firing]).

(b) Synaptic (excitatory and inhibitory) blockade minimally affects the difference in burst firing between WT and *Shank2*<sup>-/-</sup> P<sub>v</sub> neurons neighboring the directly stimulated P<sub>v</sub> neurons, as shown by neuronal proportions with distinct firing patterns and mean firing rates. The following synaptic blockers were used to block excitatory and inhibitory synaptic transmission; GABAzine (SR-95531; 10 μM) for GABA receptors, APV (50 μM) for NMDA receptors, and NBQX (10 μM) for AMPA receptors. Note that the moderate (~2-fold) decrease in burst firing in *Shank2*<sup>-/-</sup> P<sub>v</sub> neurons contrasts sharply with the mefloquine-induced strong (~20-fold; from 16% to 0.67%) decrease in burst firing in *Shank2*<sup>-/-</sup> P<sub>v</sub> neurons (**Fig. 5b**). Data: minimal, maximal, median, 25%, and 75% values. (n = 47/10 [WT-ACSF], 42/15 [KO-ACSF], 8/3 [WT-blockade], and 8/3 [KO-blockade], \*\*p < 0.01, ns, not significant, Chi-square test [proportion], two-way ANOVA with Tukey's test [firing rate]).

See Source Data for raw data values and Supplementary Table 1 for statistical details.

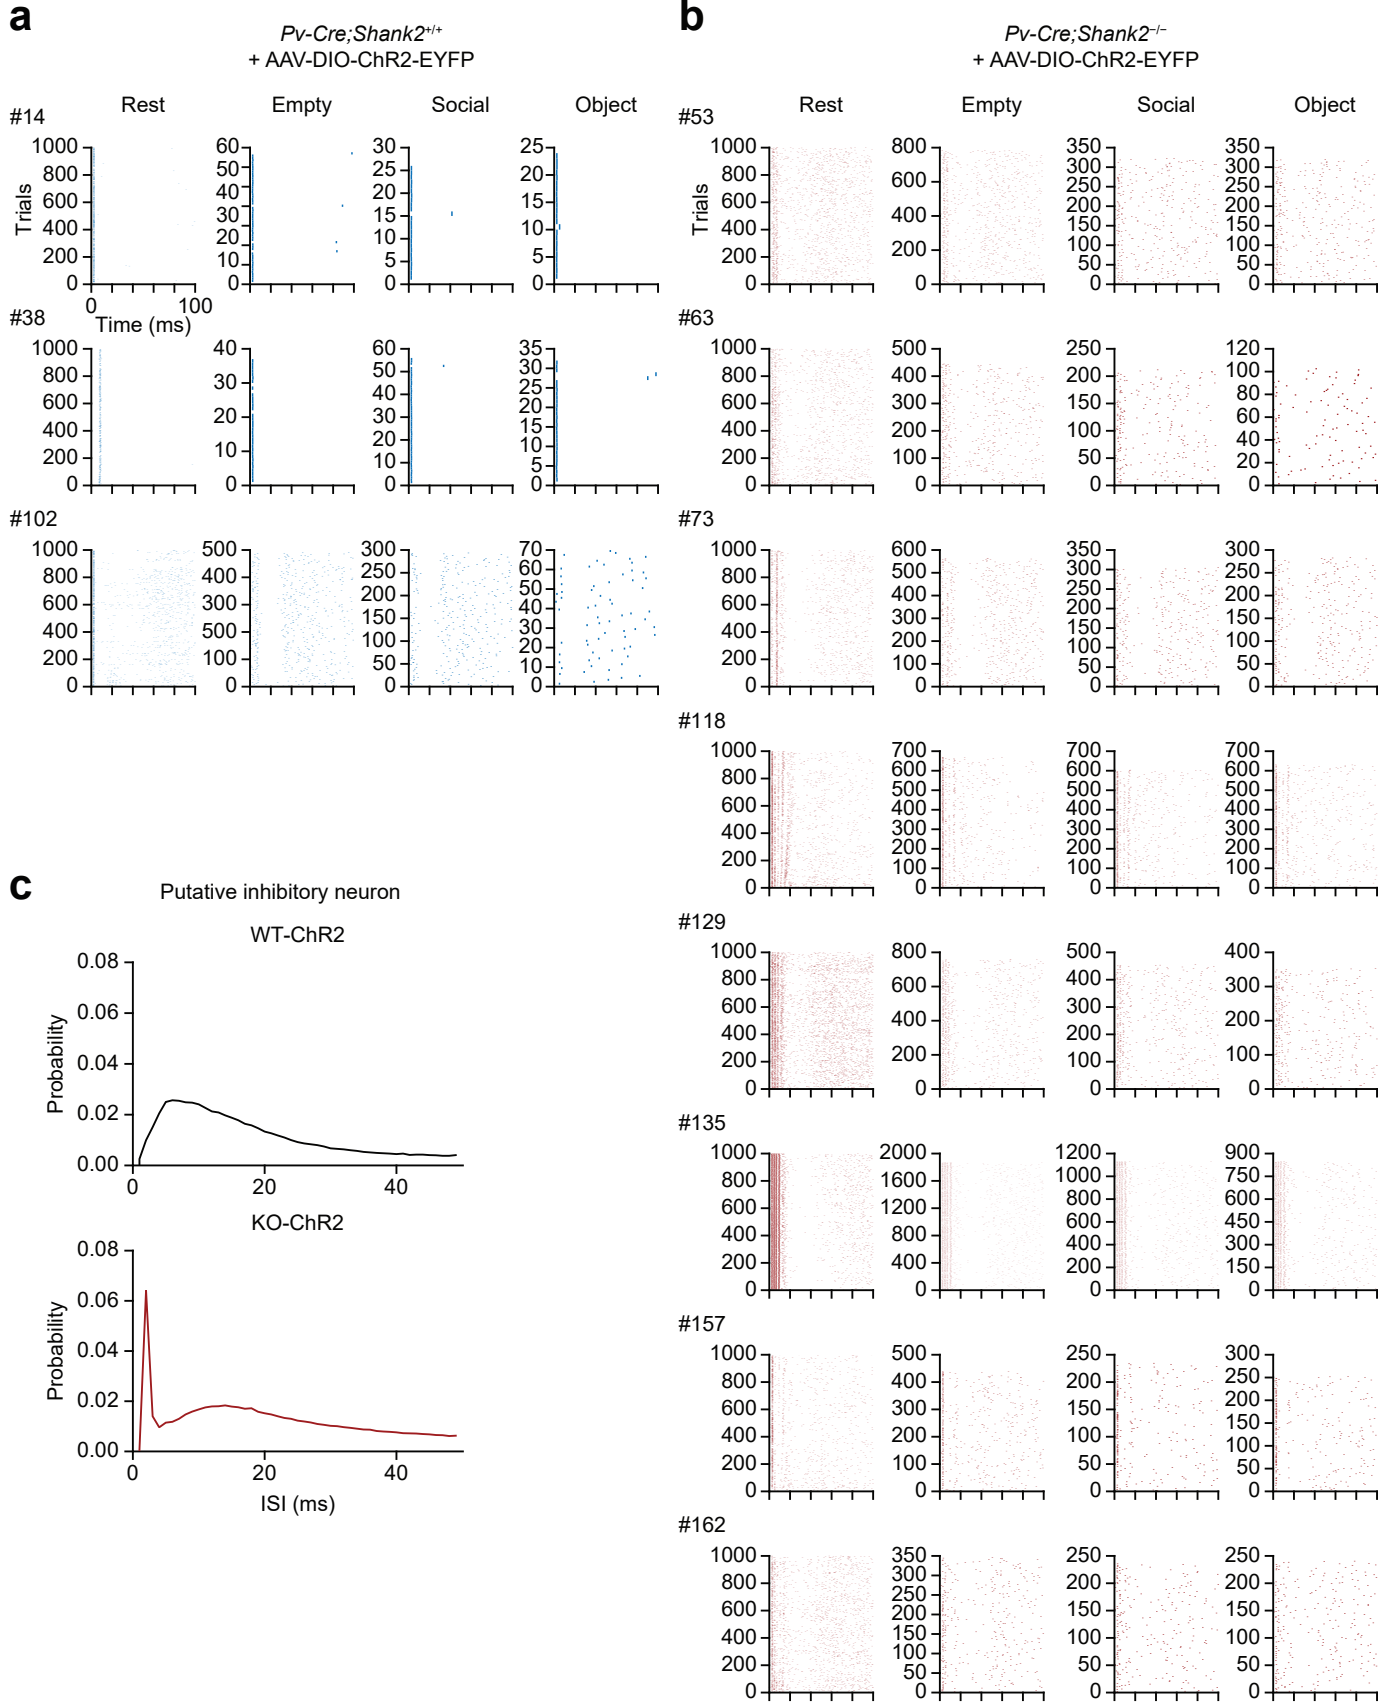

**Supplementary figure 7. Optogenetic Pv neuronal stimulation induces strong burst firings in the mPFC of freely behaving *Shank2*<sup>-/-</sup> mice.**

(a and b) Optogenetic Pv neuronal stimulation (473 nm, 5 ms, 10 Hz) leads to stronger burst firings in the mPFC of *Shank2*<sup>-/-</sup> mice compared with WT mice, as shown by neuronal firings that frequently occur immediately after the 5-ms light stimulation epochs. By comparison, such firings are rarely observed in the WT mPFC, where light stimulation-matched tonic firings are prevalent. *Pv-Cre;WT* and *Pv-Cre;Shank2*<sup>-/-</sup> mice were injected with AAV-DIO-ChR2-EYFP in the mPFC and allowed to express ChR2-EYFP for 3 week before Pv neuronal stimulation in the mPFC during R state or E/O/S encounters. Numbers indicate individual neurons.

(c) ISI (interspike interval) analyses of plnh neuronal firings in the mPFC of WT and *Shank2*<sup>-/-</sup> mice indicate strong increases in the ISI range smaller than 5 ms in *Shank2*<sup>-/-</sup> mice, which is absent in WT mice, in line with the increased burst firings in *Shank2*<sup>-/-</sup> Pv neurons.

See Source Data for raw data values.



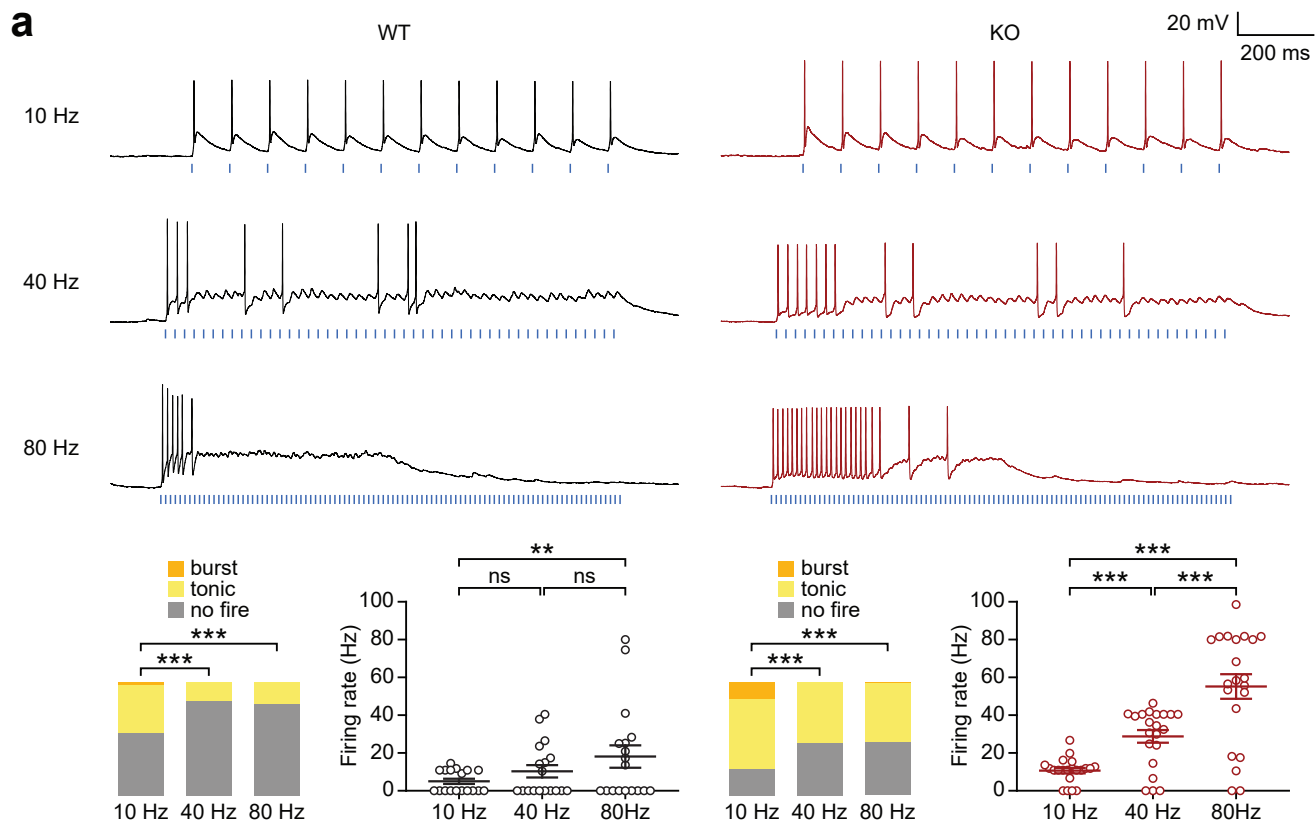

**Supplementary figure 8. Differential effects of the frequency of Pv neuronal stimulation (10, 40, and 80 Hz) on burst firing.**

(a) Differential effects of Pv neuronal stimulation at three sequential stimulation frequencies (10, 40, and 80 Hz) on burst firing in Pv neurons neighboring a stimulated neuron, as shown by proportions of firing patterns and mean-firing rates. Note that 10-Hz, but not 40-Hz or 80-Hz stimulation, can reliably induce burst firing in neighboring Pv neurons. Data: mean  $\pm$  SEM. (n = 18 neurons from 4 mice [WT], 21/4 [KO], \*\*p < 0.01, \*\*\*p < 0.001, ns, not significant, Chi-square test [proportion], two-way ANOVA with Tukey's test [firing rate]).

See Source Data for raw data values and Supplementary Table 1 for statistical details.

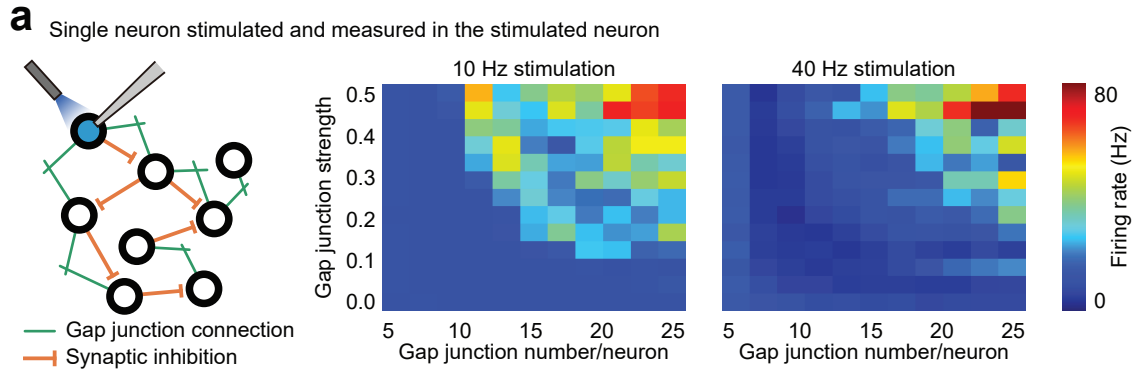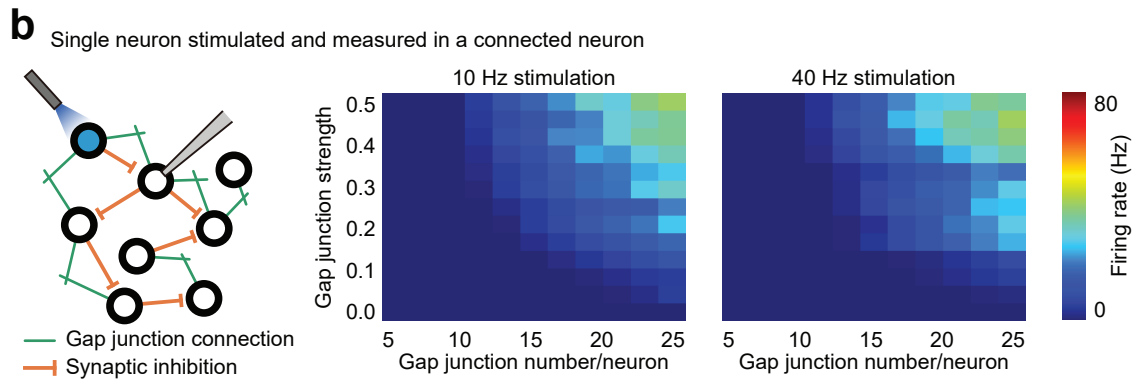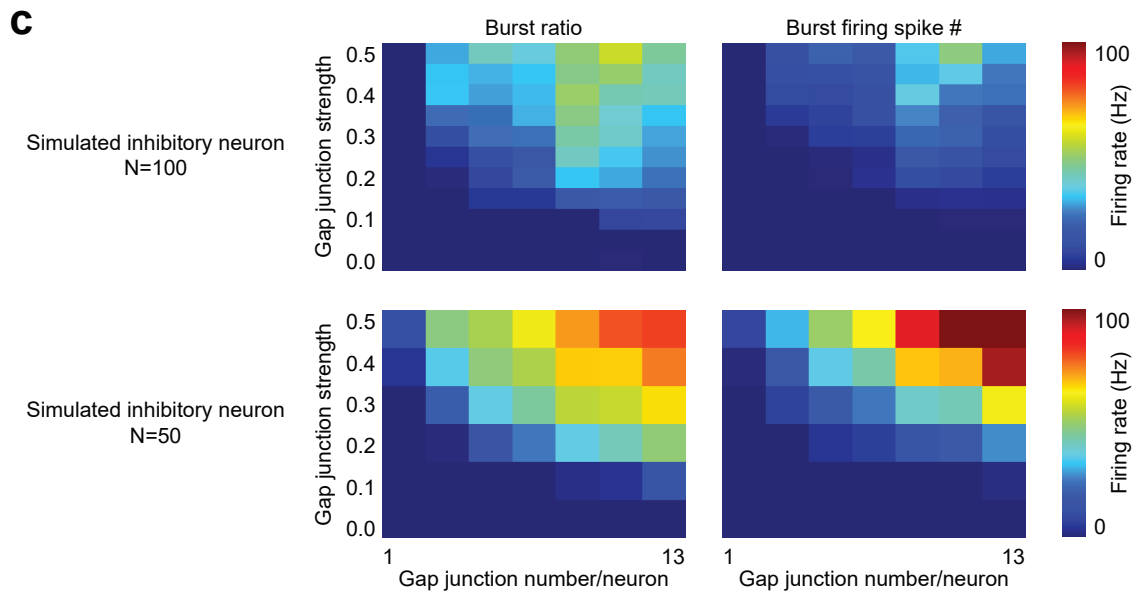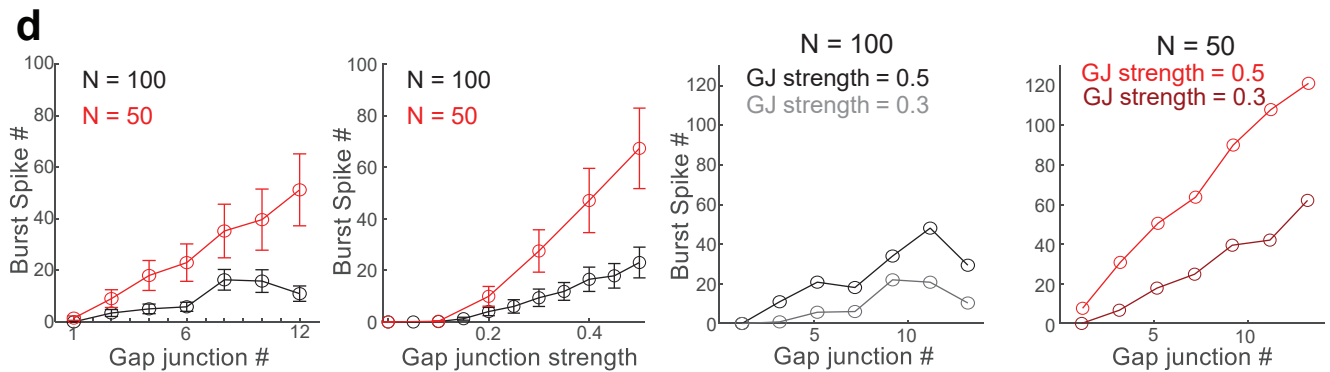

### **Supplementary figure 9. Computational modeling of burst-firing patterns of Pv neurons induced by single Pv neuronal stimulation at 10 and 40 Hz**

(a and b) Mean-firing rates in light-stimulated (at 10/40 Hz) single Pv neurons (a) and Pv neurons neighboring a light-stimulated single Pv neuron (b) in the network of 100 Pv neurons. Note that the number of gap junctions and the strength of individual gap junctions in a Pv neuron are positively correlated with the mean firing rate in the network of Pv neurons. Note also that 10- and 40-Hz Pv neuronal stimulations induce similar levels of increases in mean firing rates in stimulated and neighboring Pv neurons, although to a lesser extent in stimulated Pv neurons, in contrast with the strong burst firings induced by 10- but not 40-Hz Pv neuronal stimulation.

(c and d) Increased burst firing in the Pv neuronal network with the decreased total number of Pv neurons but the unaltered total number of gap junctions and the strength of individual gap junctions. (c) Stronger burst firing, as shown by burst ratio, in the Pv neuronal network with the decreased total number of Pv neurons ( $n = 50$ , bottom), compared with that with 100 Pv neurons (top, the condition used for the modeling described in **Fig. 5a** and the panels above [a and b]). (d) Line drawing of the results from the modeling described in (c) to highlight the impacts of the decrease in the total number of Pv neurons on burst firing (top), and the increases in the number of GJs and the strength of individual GJs on burst spike number (bottom). Data: mean  $\pm$  SEM.

See Source Data for raw data values.

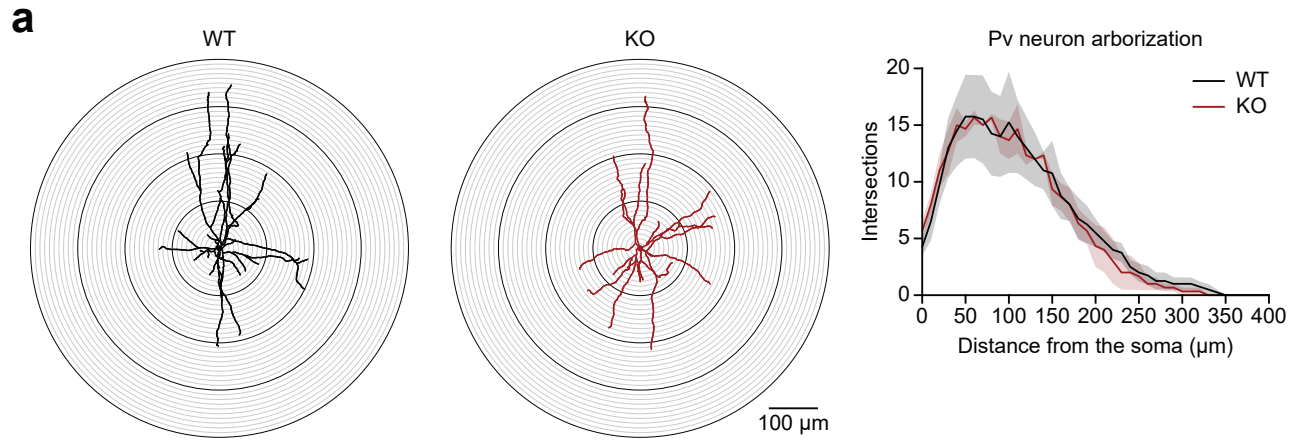

**Supplementary figure 10. Normal levels of dendritic arborization in *Shank2*<sup>-/-</sup> Pv neurons.**

(a) Comparable level of dendritic arborization in WT and *Shank2*<sup>-/-</sup> Pv neurons in the mPFC (9 weeks) as analyzed by neuronal dye infusion (NEUROBIOTIN Tracer; Vector Lab) followed by Sholl analysis (right).

See Source Data for raw data values and Supplementary Table 1 for statistical details.

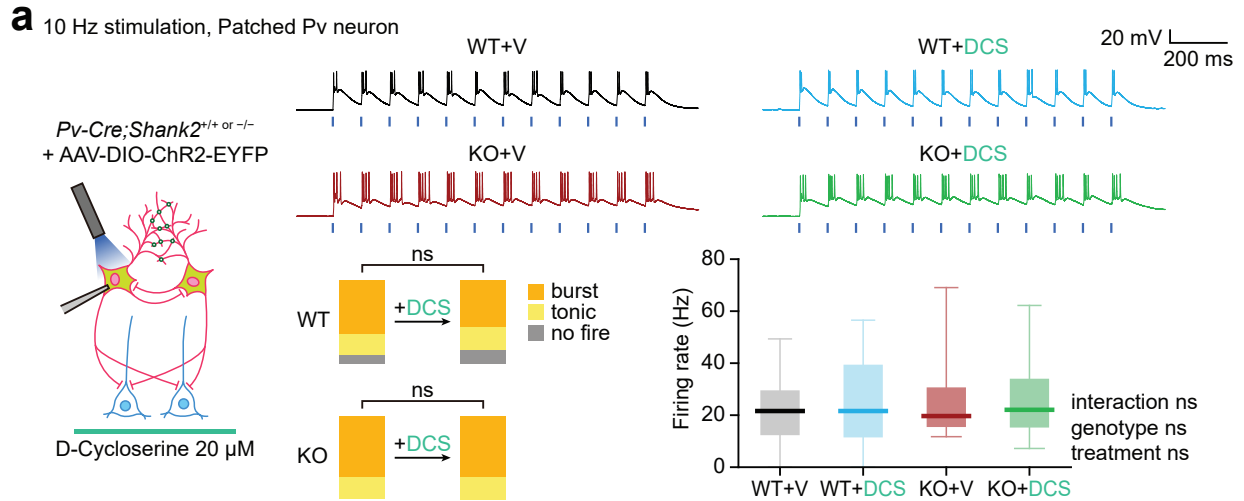

**Supplementary figure 11. NMDAR activation does not enhance burst firing in directly light-stimulated WT or Shank2-KO Pv neurons.**

(a) NMDAR activation by D-cycloserine treatment (20 μM) does not enhance burst firing in *Shank2<sup>-/-</sup>* or WT Pv neurons that are directly light stimulated in slice preparations (prelimbic, layer 2/3, 12–13 weeks). Data: minimal, maximal, median, 25%, and 75% values. (n = 20, 7 [WT-V/vehicle, before D-cycloserine/DCS treatment]; 20, 7 [WT-DCS, after DCS treatment], 16, 4 [KO-V], and 16, 4 [KO-MQ], ns, not significant, Chi-square test [proportion], Wilcoxon matched-pairs signed rank test and Student's t-test [firing rate]).

See Source Data for raw data values and Supplementary Table 1 for statistical details.

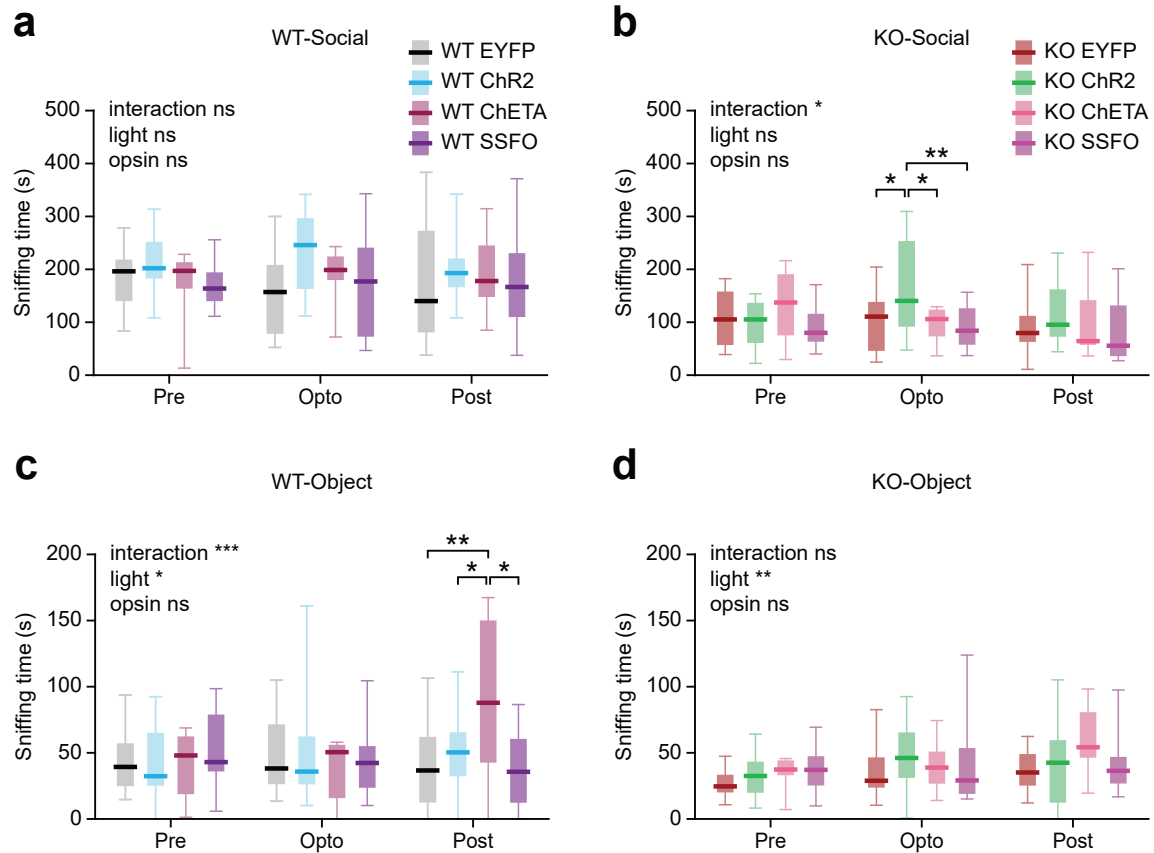

**Supplementary figure 12. Burst-evoking Pv neuronal stimulation improves social interaction and cortical social representation, indicated by two-way ANOVA results.**

(a–d) The results shown in Fig. 7b-e are presented here again using two-way ANOVA results. Data: minimal, maximal, median, 25%, and 75% values. Data: mean  $\pm$  SEM. (n = 15 mice [WT-EYFP], 11 [KO-EYFP], 20 [WT-ChR2-10-Hz], 16 [KO-ChR2-10-Hz], 8 [WT-ChETA], 10 [KO-ChETA], 15 [WT-SSFO], 14 [KO-SSFO], \*p < 0.05, \*\*p < 0.01, \*\*\*p < 0.001, two-way repeated-measures ANOVA with Tukey's test).

See Source Data for raw data values and Supplementary Table 1 for statistical details.

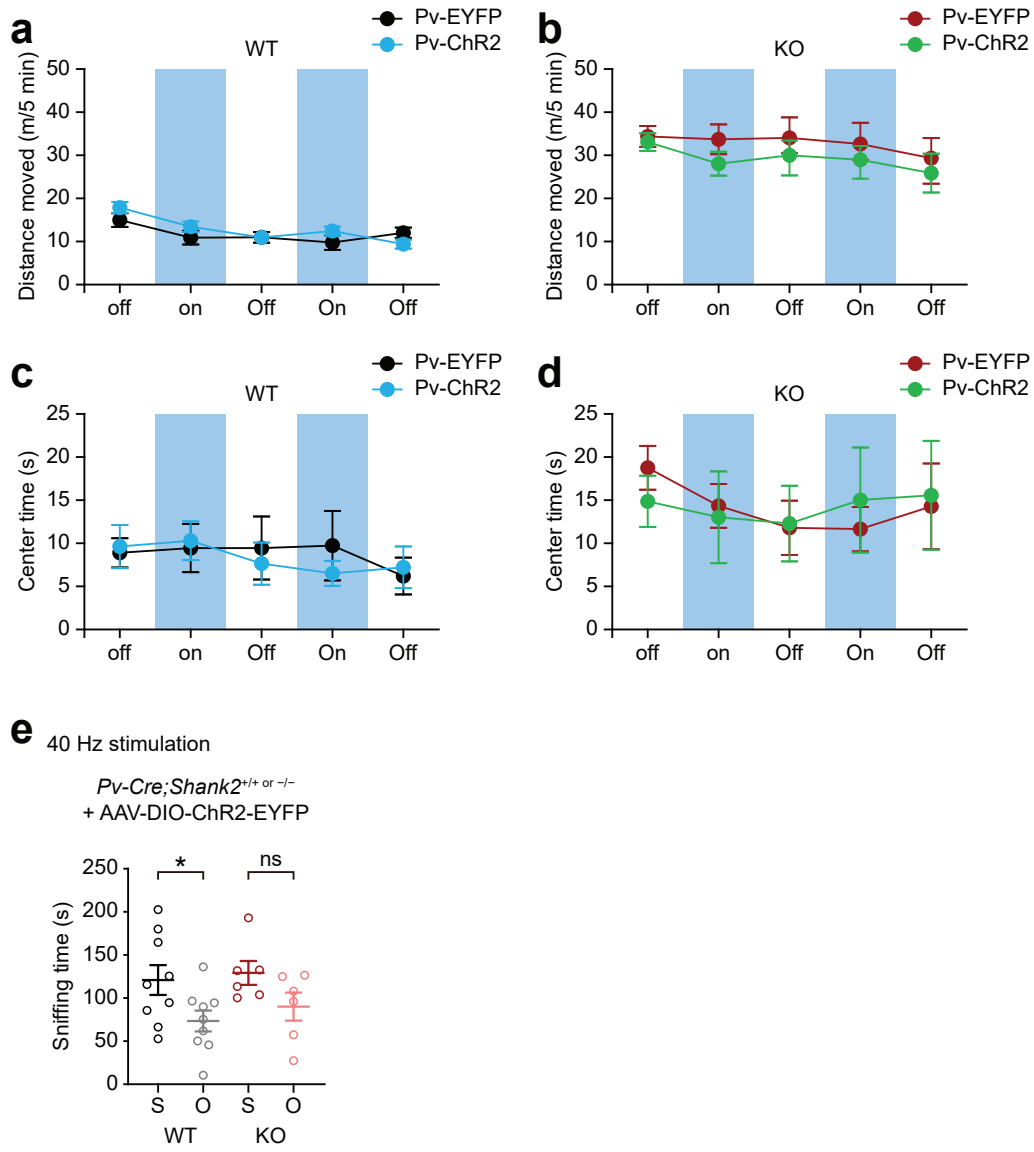

**Supplementary figure 13. 10-Hz Pv neuronal stimulation does not affect locomotor activity or anxiety-like behavior in WT or *Shank2*<sup>-/-</sup> mice, and 40-Hz Pv neuronal stimulation fails to rescue social interaction in *Shank2*<sup>-/-</sup> mice.**

(a and b) Effect of optogenetic stimulation of Pv neurons on locomotor activity. *PvCre;WT* and *Pv-Cre;Shank2*<sup>-/-</sup> mice were infected in the mPFC with AAV-DIO-ChR2EYFP or AAV-DIO-EYFP (>8 + 3 weeks), followed by blue light stimulation (10 Hz, 5 ms, 473 nm) in the mPFC in the open-field test, in which 5-min light-on and light-off sessions were alternated over 25 min. Data: mean ± SEM. (n = 12 mice [WT-EYFP], 20 [WT-ChR2], 12 [KO-EYFP], 14 [KO-ChR2], two-way repeated-measures ANOVA).

(c and d) Time spent in the center region of the open-field arena was also analyzed as a measure of anxiety-like behavior. Data: mean ± SEM. (n = 12 mice [WT-EYFP], 20 [WT-ChR2], 12 [KO-EYFP], 14 [KO-ChR2], two-way repeated-measures ANOVA).

(e) ChR2-driven Pv neuronal stimulation at 40 Hz (5 ms; ChR2) in the mPFC does not improve three-chamber social interaction in *Pv-Cre;Shank2*<sup>-/-</sup> mice infected in the mPFC with the indicated viruses (>8 + 3 weeks), as shown by time spent sniffing (or nose-poking) social and object targets. Note that light-stimulated WT mice prefer to explore S over O target, whereas light-stimulated mutant mice do not social preference. Mice were subjected to a single round of the three-chamber test, without involving Pre or Post round without light stimulation. Data: mean ± SEM. (n = 9 mice [KO-EYFP], 6 [KO-ChR2-40-Hz], \*p < 0.05, ns, not significant, Student's t-test).

See Source Data for raw data values and Supplementary Table 1 for statistical details.



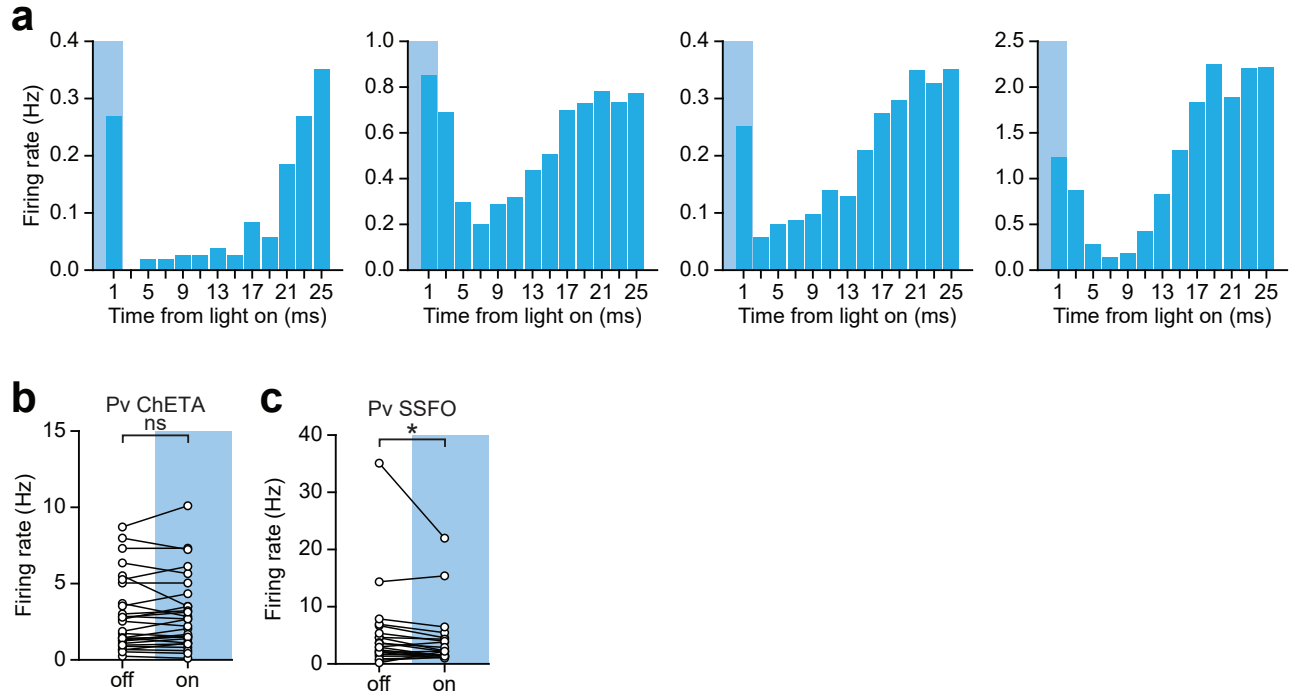

**Supplementary figure 14. Examples of mPFC neuronal responses to different optogenetic manipulations of Pv neurons.**

(a and b) Stimulation of ChETA-expressing Pv neurons at 40 Hz induces transient (~10–20 ms) decreases in firing rates of mPFC neurons, which likely represent Pv neuronal targets, immediately after the 2-ms light stimulation, as shown by peristimulus time histograms, without affecting the mean firing rate of mPFC neurons. In vivo single units were recorded for 20 min in mPFC neurons in *Pv-Cre;WT* mice injected in the mPFC with AAV-DIO-ChETA-EYFP in the presence and absence of light stimulation (40 Hz, 2 ms). (n = 25 neurons, ns, not significant, Wilcoxon matched-pairs signed rank test).

(c) Stimulation of Pv neurons expressing SSFO induces a decrease in the mean firing rate of mPFC neurons. In vivo single units were recorded in mPFC neurons for 20 min in *Pv-Cre;WT* mice injected in the mPFC with AAV-DIO-SSFO-EYFP in the absence of light stimulation or after a 2-s light stimulation, which induces long-lasting activation of SSFO. (n = 25 neurons, \*p < 0.05, Wilcoxon matched-pairs signed rank test).

See Source Data for raw data values and Supplementary Table 1 for statistical details.

- WT EYFP
- WT ChR2
- KO EYFP
- KO ChR2

**a**

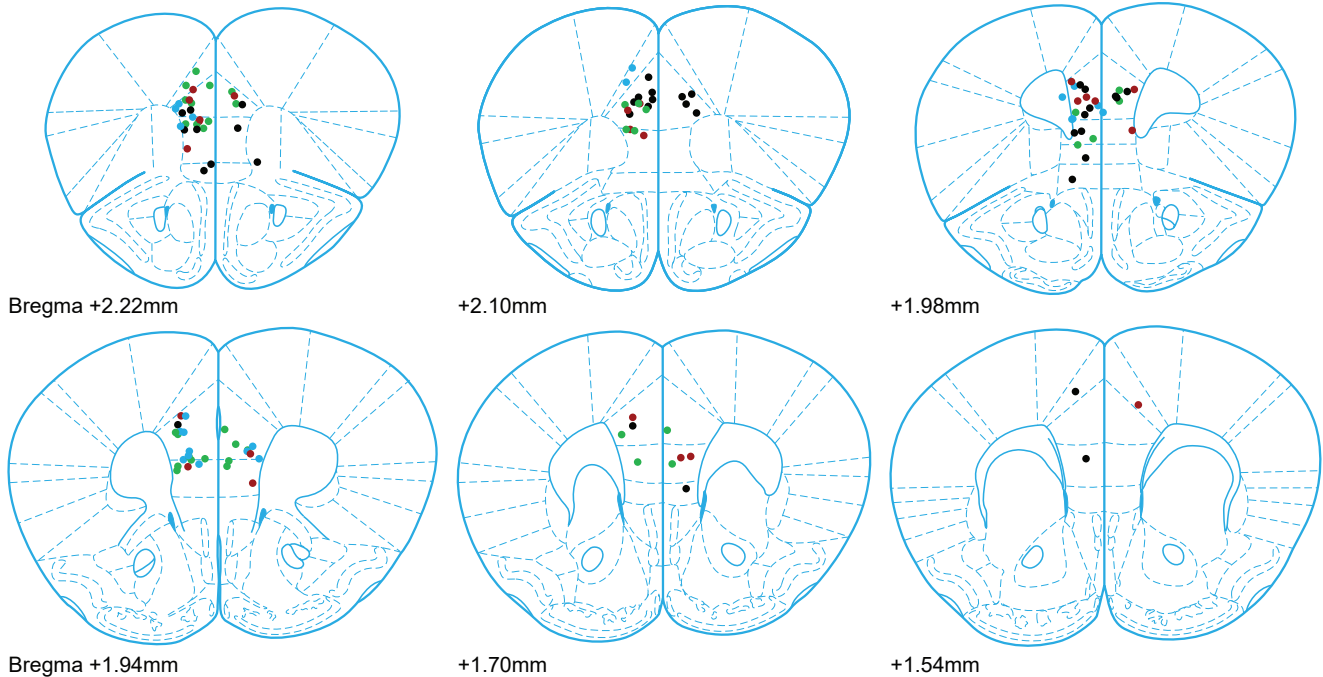

**b**

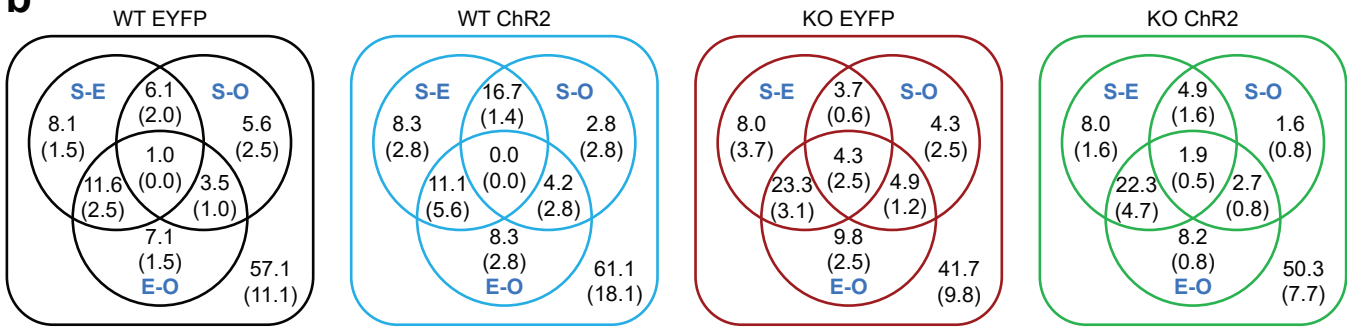

**c**

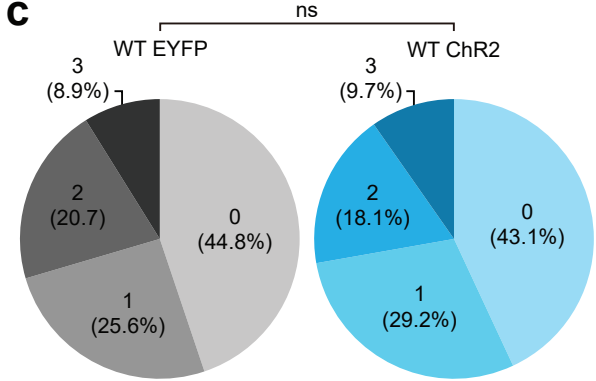

**Supplementary figure 15. Positions of tetrode tips in the mPFC, and responses of WT and *Shank2*<sup>-/-</sup> mPFC neurons during target encounters in the presence and absence of 10-Hz optogenetic Pv neuronal stimulation.**

(a) Positions of tetrode tips in the mPFC of WT and *Shank2*<sup>-/-</sup> mice used to measure single-unit recordings in the presence and absence of 10-Hz Pv neuronal stimulation.

(b) Discharge patterns of mPFC neurons in WT and *Shank2*<sup>-/-</sup> mice (3 mo) to social and non-social targets, as shown by a Venn diagram with proportions of mPFC neurons (in percentage) that show discriminative discharges (ANOVA,  $p < 0.05$ ) to specific target pairs (S-E, S-O, and E-O) or those with target-specific responses (S-specific/spc, overlap of S-E and S-O; O-spc, overlap of S-O and E-O; E-spc, overlap of S-E and E-O). (n = 194 neurons from 7 mice for WT-EYFP, 72, 8 [WT-ChR2], 163, 4 [KO-EYFP], and 364, 9 [KO-ChR2]).

(c) 10-Hz Pv neuronal stimulation in the mPFC of WT mice exploring social and nonsocial targets in the linear apparatus does not affect the number of total targets to which a single neuron can respond. (n = 194, 7 [WT-EYFP], 72, 8 [WT-ChR2], ns, not significant, Chi-square test).

See Source Data for raw data values and Supplementary Table 1 for statistical details.

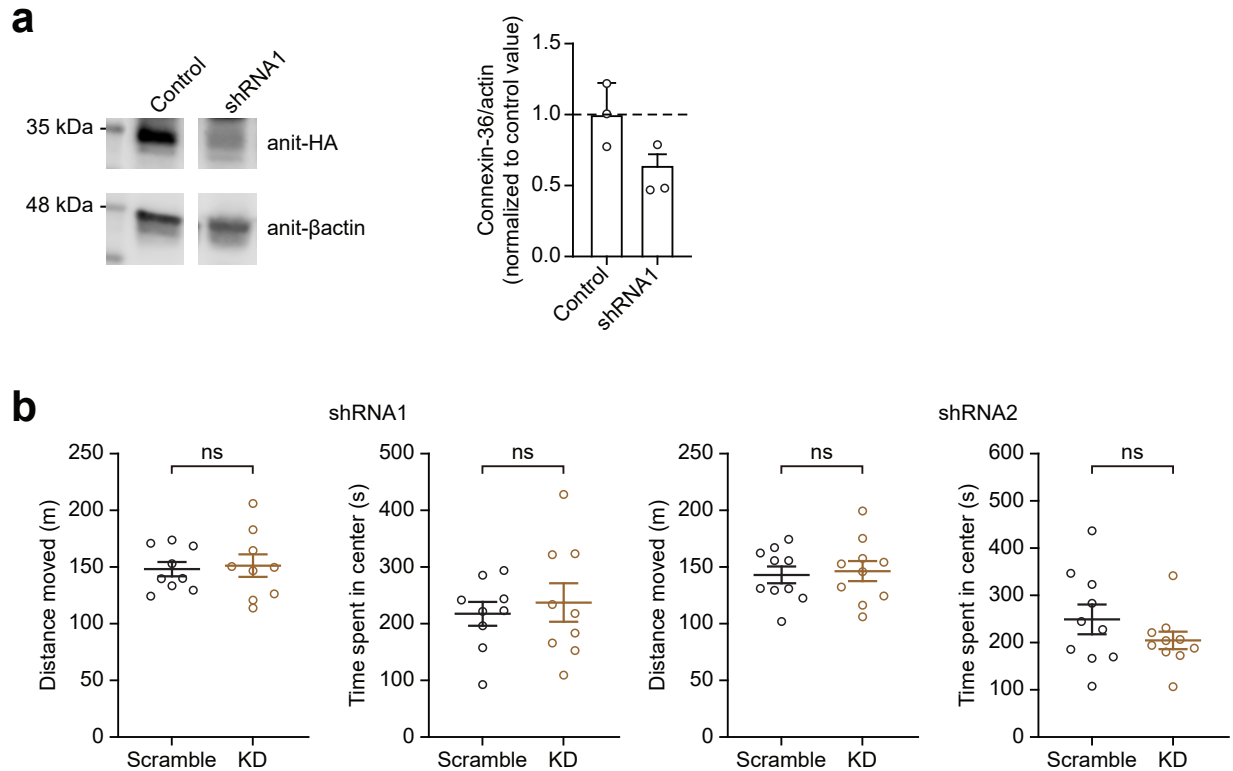

**Supplementary figure 16. Characterization of connexin-36 knockdown constructs.**

(a) Knockdown efficiency of connexin-36-shRNA1 and connexin-36-shRNA2 by AAV-S5E2-Flex-shRNA1 infection of HEK293T cells expressing the connexin-36-HA expression construct, followed by immunoblot analysis, which show that ~50% knockdown efficiency of target protein expression. Test of shRNA2 could not be performed because of low infection efficiency of HEK293T cells and also detecting reliable bands of endogenous connexin-36 protein in mouse brain lysates by immunoblot analysis was not feasible. (n = 3 independent experiments [WT and KO]).

(b) Lack of the effects of connexin-36 knockdown (KD) by AAV-shRNA1/2 in the locomotor activity (total distance moved) and anxiety-like behavior (center time) in WT mice in the open-field test. (n = 9 mice [control 1], 9 [shRNA1], 10 [control 2], 10 [shRNA2], ns, not significant, Student's t-test).

See Source Data for raw data values and images and Supplementary Table 1 for statistical details.

# Supplementary tables

## Supplementary Table 1. Statistical details.

| Figure          | Assay Performed           | Parameter                               | Sex      | Age    | Comparison                                         | n                                                  | Average ± SEM                                      | Median (IQ, 3Q)                                                     | Statistical Test                                  | Significance                                                    | Statistical Analysis                                            | Summary |
|-----------------|---------------------------|-----------------------------------------|----------|--------|----------------------------------------------------|----------------------------------------------------|----------------------------------------------------|---------------------------------------------------------------------|---------------------------------------------------|-----------------------------------------------------------------|-----------------------------------------------------------------|---------|
| Figure 1d       | in vivo recording         | S-specific                              | M        | >12wks | WT-295 neurons/5 mice<br>KO-409 neurons/5 mice     | WT n=207 / 85                                      | WT                                                 | Chi-square test                                                     | p=0.0021                                          | ..                                                              |                                                                 |         |
|                 |                           |                                         |          |        |                                                    | WT n=258 / 41                                      | WT                                                 | Chi-square test                                                     | p=0.0194                                          | ..                                                              |                                                                 |         |
|                 |                           |                                         |          |        |                                                    | KO n=126 / 84                                      | KO                                                 | Chi-square test                                                     | p=0.549                                           | ns                                                              |                                                                 |         |
|                 |                           |                                         |          |        |                                                    | WT n=295 / 5 mice                                  | WT                                                 | Chi-square test                                                     | p=0.007                                           | ..                                                              |                                                                 |         |
|                 |                           |                                         |          |        |                                                    | WT n=295 / 5 mice                                  | WT                                                 | Chi-square test                                                     | p=0.0001                                          | ***                                                             |                                                                 |         |
| Figure 1e       | in vivo recording         | number of target discrimination         | M        | >12wks | WT-295 neurons/5 mice<br>KO-409 neurons/5 mice     | WT n=193 / 53, 33, 3                               | WT                                                 | Chi-square test                                                     | p=0.0001                                          | ***                                                             |                                                                 |         |
|                 |                           |                                         |          |        |                                                    | KO n=196 / 34, 9, 34, 5                            | KO                                                 | Chi-square test                                                     | p=0.0005                                          | ***                                                             |                                                                 |         |
| Figure 2b       | in vivo recording         | putative excitatory neuron              | M        | >12wks | WT-295 / 5                                         | E-R: 0.0187±0.0067                                 | E-R                                                | Friedman test with Dunn's multiple comparison test                  | p=0.0005                                          | WT vs KO: E-R p=0.1945, O-R p=0.350, S-R p=0.0011               |                                                                 |         |
|                 |                           |                                         |          |        |                                                    | O-R: 0.0094±0.00719                                | O-R                                                | Friedman test with Dunn's multiple comparison test                  | p=0.0109                                          | WT vs KO: E-R p=0.1945, E-R vs S-R p=0.032, O-R vs S-R p=0.0085 |                                                                 |         |
|                 |                           | KO m=340 / 5                            |          |        | E-R: 0.0198±0.00300                                | E-R                                                | Friedman test with Dunn's multiple comparison test | p=0.258                                                             | WT vs KO: E-R p=0.1945, O-R p=0.350, S-R p=0.0011 |                                                                 |                                                                 |         |
|                 |                           | O-R: 0.0194±0.007018                    |          |        | O-R                                                | Friedman test with Dunn's multiple comparison test | p=0.118                                            | WT vs KO: E-R p=0.1945, E-R vs S-R p=0.032, O-R vs S-R p=0.0085     |                                                   |                                                                 |                                                                 |         |
| Figure 2b       | in vivo recording (g/gh)  | High firing ISI diff.                   | M        | >12wks | WT m=36 / 5                                        | E-R: 0.0184±0.0017                                 | E-R                                                | Repeated measures of Two Way ANOVA with Sidak's multiple comparison | genotype p=0.0129                                 | WT vs KO: E-R p=0.1945, O-R p=0.350, S-R p=0.0011               |                                                                 |         |
|                 |                           |                                         |          |        |                                                    | KO m=41 / 5                                        | O-R: 0.0124±0.0096                                 | O-R                                                                 | Repeated measures of Two Way ANOVA                | target p=0.2808                                                 | WT vs KO: E-R p=0.1945, E-R vs S-R p=0.032, O-R vs S-R p=0.0085 |         |
| Figure 3a       | in vivo recording (g/Exc) | High firing ISI diff.                   | M        | >12wks | WT m=286 / 5                                       | E-R: 0.0094±0.0075                                 | E-R                                                | Repeated measures of Two Way ANOVA                                  | genotype p=0.249                                  | WT vs KO: E-R p=0.1945, O-R p=0.350, S-R p=0.0011               |                                                                 |         |
|                 |                           |                                         |          |        |                                                    | KO m=340 / 5                                       | O-R: 0.0194±0.0070                                 | O-R                                                                 | Repeated measures of Two Way ANOVA                | target p=0.515                                                  | WT vs KO: E-R p=0.1945, E-R vs S-R p=0.032, O-R vs S-R p=0.0085 |         |
|                 |                           |                                         |          |        |                                                    | WT n=53                                            | Rest: 0.335±0.00912                                | Rest                                                                | Two Way ANOVA with Tukey's test                   | event p=0.153                                                   | WT vs KO: p=0.014                                               |         |
|                 |                           |                                         |          |        |                                                    | KO n=52                                            | Target: 0.321±0.00527                              | Target                                                              | Two Way ANOVA with Tukey's test                   | interaction p=0.712                                             | WT vs KO: p=0.001                                               |         |
| Figure 3a       | in vivo recording (g/Exc) | High firing ISI diff.                   | M        | >12wks | WT n=53                                            | Rest: 0.366±0.00921                                | Rest                                               | Two Way ANOVA with Tukey's test                                     | genotype p=0.001                                  | WT vs KO: p=0.014                                               |                                                                 |         |
|                 |                           |                                         |          |        |                                                    | KO n=52                                            | Target: 0.308±0.00532                              | Target                                                              | Two Way ANOVA with Tukey's test                   | event p=0.001                                                   | WT vs KO: p=0.014                                               |         |
|                 |                           |                                         |          |        |                                                    | WT n=53                                            | Rest: 0.0453±0.00318                               | Rest                                                                | Two Way ANOVA with Tukey's test                   | interaction p=0.001                                             | WT vs KO: p=0.014                                               |         |
|                 |                           |                                         |          |        |                                                    | KO n=52                                            | Target: 0.0768±0.00321                             | Target                                                              | Two Way ANOVA with Tukey's test                   | event p=0.001                                                   | WT vs KO: p=0.014                                               |         |
| Figure 3a       | in vivo recording (g/Exc) | High firing ISI diff.                   | M        | >12wks | WT n=53                                            | Rest: 0.0154±0.0117                                | Rest                                               | Two Way ANOVA with Tukey's test                                     | genotype p=0.001                                  | WT vs KO: p=0.014                                               |                                                                 |         |
|                 |                           |                                         |          |        |                                                    | KO n=52                                            | Target: 0.0138±0.0102                              | Target                                                              | Two Way ANOVA with Tukey's test                   | event p=0.001                                                   | WT vs KO: p=0.014                                               |         |
|                 |                           |                                         |          |        |                                                    | WT n=53                                            | Rest: 0.0264±0.00179                               | Rest                                                                | Two Way ANOVA with Tukey's test                   | interaction p=0.002                                             | WT vs KO: p=0.014                                               |         |
|                 |                           |                                         |          |        |                                                    | KO n=52                                            | Target: 0.0154±0.00163                             | Target                                                              | Two Way ANOVA with Tukey's test                   | event p=0.002                                                   | WT vs KO: p=0.014                                               |         |
| Figure 3c       | Linear Chamber            | Delta PSD                               | M        | 12wks  | WT m=53                                            | Rest: 0.0164±0.00284                               | Rest                                               | Two Way ANOVA with Tukey's test                                     | genotype p=0.548                                  | WT vs KO: p=0.153                                               |                                                                 |         |
|                 |                           |                                         |          |        |                                                    | KO m=52                                            | Target: 0.0154±0.00164                             | Target                                                              | Two Way ANOVA with Tukey's test                   | event p=0.005                                                   | WT vs KO: p=0.014                                               |         |
|                 |                           |                                         |          |        |                                                    | WT m=53                                            | Rest: 0.0125±0.00166                               | Rest                                                                | Two Way ANOVA with Tukey's test                   | interaction p=0.062                                             | WT vs KO: p=0.153                                               |         |
|                 |                           |                                         |          |        |                                                    | KO m=52                                            | Target: 0.0143±0.000620                            | Target                                                              | Two Way ANOVA with Tukey's test                   | event p=0.002                                                   | WT vs KO: p=0.014                                               |         |
| Figure 3c       | Linear Chamber            | Theta PSD                               | M        | 12wks  | WT m=53                                            | Rest: 0.0138±0.0102                                | Rest                                               | Two Way ANOVA with Tukey's test                                     | genotype p=0.001                                  | WT vs KO: p=0.014                                               |                                                                 |         |
|                 |                           |                                         |          |        |                                                    | KO n=52                                            | Target: 0.0264±0.00179                             | Target                                                              | Two Way ANOVA with Tukey's test                   | event p=0.001                                                   | WT vs KO: p=0.014                                               |         |
|                 |                           |                                         |          |        |                                                    | WT m=53                                            | Rest: 0.0154±0.00163                               | Rest                                                                | Two Way ANOVA with Tukey's test                   | interaction p=0.002                                             | WT vs KO: p=0.014                                               |         |
|                 |                           |                                         |          |        |                                                    | KO n=52                                            | Target: 0.0154±0.00164                             | Target                                                              | Two Way ANOVA with Tukey's test                   | event p=0.002                                                   | WT vs KO: p=0.014                                               |         |
| Figure 3c       | Linear Chamber            | Alpha PSD                               | M        | 12wks  | WT m=53                                            | Rest: 0.0125±0.00166                               | Rest                                               | Two Way ANOVA with Tukey's test                                     | genotype p=0.548                                  | WT vs KO: p=0.153                                               |                                                                 |         |
|                 |                           |                                         |          |        |                                                    | KO m=52                                            | Target: 0.0143±0.000620                            | Target                                                              | Two Way ANOVA with Tukey's test                   | event p=0.002                                                   | WT vs KO: p=0.014                                               |         |
|                 |                           |                                         |          |        |                                                    | WT m=53                                            | Rest: 0.0138±0.0102                                | Rest                                                                | Two Way ANOVA with Tukey's test                   | interaction p=0.002                                             | WT vs KO: p=0.014                                               |         |
|                 |                           |                                         |          |        |                                                    | KO n=52                                            | Target: 0.0264±0.00179                             | Target                                                              | Two Way ANOVA with Tukey's test                   | event p=0.001                                                   | WT vs KO: p=0.014                                               |         |
| Figure 3c       | Linear Chamber            | Gamma PSD                               | M        | 12wks  | WT m=53                                            | Rest: 0.0154±0.00163                               | Rest                                               | Two Way ANOVA with Tukey's test                                     | genotype p=0.001                                  | WT vs KO: p=0.014                                               |                                                                 |         |
|                 |                           |                                         |          |        |                                                    | KO n=52                                            | Target: 0.0154±0.00164                             | Target                                                              | Two Way ANOVA with Tukey's test                   | event p=0.002                                                   | WT vs KO: p=0.014                                               |         |
|                 |                           |                                         |          |        |                                                    | WT m=53                                            | Rest: 0.0125±0.00166                               | Rest                                                                | Two Way ANOVA with Tukey's test                   | interaction p=0.062                                             | WT vs KO: p=0.153                                               |         |
|                 |                           |                                         |          |        |                                                    | KO m=52                                            | Target: 0.0143±0.000620                            | Target                                                              | Two Way ANOVA with Tukey's test                   | event p=0.002                                                   | WT vs KO: p=0.014                                               |         |
| Figure 3c       | Linear Chamber            | WT pre_post-Gamma PSD                   | M        | 12wks  | Empty WT=52                                        | Pre: 0.0138±0.00260                                | Pre                                                | Two Way ANOVA with Tukey's test                                     | time p=0.441                                      | Empty pre vs post p=0.677                                       |                                                                 |         |
|                 |                           |                                         |          |        |                                                    | Social WT=52                                       | Post: 0.0143±0.000620                              | Post                                                                | Two Way ANOVA with Tukey's test                   | target p=0.009                                                  | Social pre vs post p=0.258                                      |         |
|                 |                           |                                         |          |        |                                                    | object WT=52                                       | Post: 0.0138±0.000620                              | Post                                                                | Two Way ANOVA with Tukey's test                   | interaction p=0.001                                             | object pre vs post p=0.003                                      |         |
|                 |                           |                                         |          |        |                                                    | Empty KO=53                                        | Pre: 0.0143±0.000620                               | Pre                                                                 | Two Way ANOVA with Tukey's test                   | time p=0.001                                                    | Empty pre vs post p=0.003                                       |         |
| Figure 3c       | Linear Chamber            | KO pre_post-Gamma PSD                   | M        | 12wks  | Social KO=53                                       | Post: 0.0143±0.000620                              | Post                                               | Two Way ANOVA with Tukey's test                                     | target p=0.149                                    | Social pre vs post p=0.005                                      |                                                                 |         |
|                 |                           |                                         |          |        |                                                    | object KO=53                                       | Post: 0.0138±0.000620                              | Post                                                                | Two Way ANOVA with Tukey's test                   | interaction p=0.346                                             | object pre vs post p=0.001                                      |         |
|                 |                           |                                         |          |        |                                                    | Empty WT=52                                        | Pre: 0.0138±0.000620                               | Pre                                                                 | Two Way ANOVA with Tukey's test                   | time p=0.441                                                    | Empty pre vs post p=0.677                                       |         |
|                 |                           |                                         |          |        |                                                    | Social WT=52                                       | Post: 0.0143±0.000620                              | Post                                                                | Two Way ANOVA with Tukey's test                   | target p=0.009                                                  | Social pre vs post p=0.258                                      |         |
| Figure 4a       | slice electrophysiology   | sEPSC Py frequency                      | M        | 12wks  | WT: 23 neurons / 5 mice<br>KO: 14 neurons / 4 mice | WT: 3.09±0.2391                                    | WT                                                 | Mann Whitney, two-tailed                                            | p=0.8167                                          | ns                                                              |                                                                 |         |
|                 |                           |                                         |          |        |                                                    | (2.20, 3.483)                                      |                                                    |                                                                     |                                                   |                                                                 |                                                                 |         |
|                 |                           |                                         |          |        |                                                    | KO: 2.89±0.2716                                    | KO                                                 | Mann Whitney, two-tailed                                            | p=0.7678                                          | ns                                                              |                                                                 |         |
|                 |                           |                                         |          |        |                                                    | (2.265, 3.856)                                     |                                                    |                                                                     |                                                   |                                                                 |                                                                 |         |
| Figure 4a       | slice electrophysiology   | sEPSC Py amplitude                      | M        | 12wks  | WT: 23 neurons / 5 mice<br>KO: 14 neurons / 4 mice | WT: 15.4±0.334                                     | WT                                                 | Mann Whitney, two-tailed                                            | p=0.7678                                          | ns                                                              |                                                                 |         |
|                 |                           |                                         |          |        |                                                    | (13.89, 16.78)                                     |                                                    |                                                                     |                                                   |                                                                 |                                                                 |         |
|                 |                           |                                         |          |        |                                                    | KO: 16.1±0.516                                     | KO                                                 | Mann Whitney, two-tailed                                            | p=0.7678                                          | ns                                                              |                                                                 |         |
|                 |                           |                                         |          |        |                                                    | (14.24, 16.88)                                     |                                                    |                                                                     |                                                   |                                                                 |                                                                 |         |
| Figure 4b       | slice electrophysiology   | sPSC Py frequency                       | M        | 12wks  | WT: 19 neurons / 6 mice<br>KO: 18 neurons / 4 mice | WT: 2.72±0.4253                                    | WT                                                 | Mann Whitney, two-tailed                                            | p=0.4079                                          | ns                                                              |                                                                 |         |
|                 |                           |                                         |          |        |                                                    | (1.290, 4.070)                                     |                                                    |                                                                     |                                                   |                                                                 |                                                                 |         |
|                 |                           |                                         |          |        |                                                    | KO: 3.08±0.5006                                    | KO                                                 | Mann Whitney, two-tailed                                            | p=0.7986                                          | ns                                                              |                                                                 |         |
|                 |                           |                                         |          |        |                                                    | (1.988, 3.983)                                     |                                                    |                                                                     |                                                   |                                                                 |                                                                 |         |
| Figure 4b       | slice electrophysiology   | sPSC Py amplitude                       | M        | 12wks  | WT: 19 neurons / 6 mice<br>KO: 18 neurons / 4 mice | WT: 52.79±4.473                                    | WT                                                 | Mann Whitney, two-tailed                                            | p=0.7986                                          | ns                                                              |                                                                 |         |
|                 |                           |                                         |          |        |                                                    | (39.13, 59.87)                                     |                                                    |                                                                     |                                                   |                                                                 |                                                                 |         |
|                 |                           |                                         |          |        |                                                    | KO: 48.42±3.274                                    | KO                                                 | Mann Whitney, two-tailed                                            | p=0.7986                                          | ns                                                              |                                                                 |         |
|                 |                           |                                         |          |        |                                                    | (36.22, 57.14)                                     |                                                    |                                                                     |                                                   |                                                                 |                                                                 |         |
| Figure 4c       | slice electrophysiology   | intrinsic excitability IO curve Py      | M        | >12wks | WT: 21 neurons / 5 mice<br>KO: 13 neurons / 5 mice | WT: 3.75±0.254                                     | WT                                                 | Repeated measures of Two Way ANOVA with Bonferroni's test           | Interaction F (0.298) = 3.705, p=0.0022           | WT vs KO                                                        |                                                                 |         |
|                 |                           |                                         |          |        |                                                    | KO: 2.63±0.183                                     | KO                                                 | Interaction F (0.298) = 3.705, p=0.0022                             | WT vs KO                                          |                                                                 |                                                                 |         |
|                 |                           |                                         |          |        |                                                    | WT: 5.29±1.334                                     | WT                                                 | Interaction F (0.298) = 3.705, p=0.0022                             | WT vs KO                                          |                                                                 |                                                                 |         |
|                 |                           |                                         |          |        |                                                    | KO: 7.74±1.074                                     | KO                                                 | Interaction F (0.298) = 3.705, p=0.0022                             | WT vs KO                                          |                                                                 |                                                                 |         |
|                 |                           |                                         |          |        |                                                    | WT: 10.927±1.874                                   | WT                                                 | Interaction F (0.298) = 3.705, p=0.0022                             | WT vs KO                                          |                                                                 |                                                                 |         |
|                 |                           |                                         |          |        |                                                    | KO: 11.081±2.259                                   | KO                                                 | Interaction F (0.298) = 3.705, p=0.0022                             | WT vs KO                                          |                                                                 |                                                                 |         |
|                 |                           |                                         |          |        |                                                    | WT: 15.93±2.138                                    | WT                                                 | Interaction F (0.298) = 3.705, p=0.0022                             | WT vs KO                                          |                                                                 |                                                                 |         |
|                 |                           |                                         |          |        |                                                    | KO: 15.20±2.716                                    | KO                                                 | Interaction F (0.298) = 3.705, p=0.0022                             | WT vs KO                                          |                                                                 |                                                                 |         |
|                 |                           |                                         |          |        |                                                    | WT: 13.89±2.099                                    | WT                                                 | Interaction F (0.298) = 3.705, p=0.0022                             | WT vs KO                                          |                                                                 |                                                                 |         |
|                 |                           |                                         |          |        |                                                    | KO: 13.50±2.191                                    | KO                                                 | Interaction F (0.298) = 3.705, p=0.0022                             | WT vs KO                                          |                                                                 |                                                                 |         |
|                 |                           |                                         |          |        |                                                    | WT: 25.00±2.276                                    | WT                                                 | Interaction F (0.298) = 3.705, p=0.0022                             | WT vs KO                                          |                                                                 |                                                                 |         |
|                 |                           |                                         |          |        |                                                    | KO: 24.34±3.278                                    | KO                                                 | Interaction F (0.298) = 3.705, p=0.0022                             | WT vs KO                                          |                                                                 |                                                                 |         |
| WT: 23.85±2.548 | WT                        | Interaction F (0.298) = 3.705, p=0.0022 | WT vs KO |        |                                                    |                                                    |                                                    |                                                                     |                                                   |                                                                 |                                                                 |         |
| KO: 23.79±3.630 | KO                        | Interaction F (0.298) = 3.705, p=0.0022 | WT vs KO |        |                                                    |                                                    |                                                    |                                                                     |                                                   |                                                                 |                                                                 |         |
| WT: 37.62±2.747 | WT                        | Interaction F (0.298) = 3.705, p=0.0022 | WT vs KO |        |                                                    |                                                    |                                                    |                                                                     |                                                   |                                                                 |                                                                 |         |
| KO: 37.62±3.305 | KO                        | Interaction F (0.298) = 3.705, p=0.0022 | WT vs KO |        |                                                    |                                                    |                                                    |                                                                     |                                                   |                                                                 |                                                                 |         |
| WT: 37.62±3.305 | WT                        | Interaction F (0.298) = 3.705, p=0.0022 | WT vs KO |        |                                                    |                                                    |                                                    |                                                                     |                                                   |                                                                 |                                                                 |         |
| KO: 37.62±3.305 | KO                        | Interaction F (0.298) = 3.705, p=0.0022 | WT vs KO |        |                                                    |                                                    |                                                    |                                                                     |                                                   |                                                                 |                                                                 |         |
| Figure 4d       | slice electrophysiology   | sPSC Pv frequency                       | M        | 12wks  | WT: 23 neurons / 7 mice<br>KO: 14 neurons / 3 mice | WT: 3.09±0.2391                                    | WT                                                 | Mann Whitney, two-tailed                                            | p=0.6708                                          | ns                                                              |                                                                 |         |
|                 |                           |                                         |          |        |                                                    | (1.430, 3.840)                                     |                                                    |                                                                     |                                                   |                                                                 |                                                                 |         |
|                 |                           |                                         |          |        |                                                    | KO: 2.89±0.2716                                    | KO                                                 | Mann Whitney, two-tailed                                            | p=0.8167                                          | ns                                                              |                                                                 |         |
|                 |                           |                                         |          |        |                                                    | (2.223, 4.713)                                     |                                                    |                                                                     |                                                   |                                                                 |                                                                 |         |
| Figure 4d       | slice electrophysiology   | sPSC Pv amplitude                       | M        | 12wks  | WT: 23 neurons / 7 mice<br>KO: 14 neurons / 3 mice | WT: 15.4±0.334                                     | WT                                                 | Mann Whitney, two-tailed                                            | p=0.8167                                          | ns                                                              |                                                                 |         |
|                 |                           |                                         |          |        |                                                    | (9.41, 16.4)                                       |                                                    |                                                                     |                                                   |                                                                 |                                                                 |         |
|                 |                           |                                         |          |        |                                                    | KO: 16.1±0.516                                     | KO                                                 | Mann Whitney, two-tailed                                            | p=0.8167                                          | ns                                                              |                                                                 |         |
|                 |                           |                                         |          |        |                                                    | (9.41, 16.4)                                       |                                                    |                                                                     |                                                   |                                                                 |                                                                 |         |
| Figure 4e       | slice electrophysiology   | sPSC Pv frequency                       | M        | 12wks  | WT: 23 neurons / 6 mice<br>KO: 28 neurons / 6 mice | WT: 2.847±0.3483                                   | WT                                                 | Mann Whitney, two-tailed                                            | p=0.0912                                          | ns                                                              |                                                                 |         |
|                 |                           |                                         |          |        |                                                    | (1.430, 3.840)                                     |                                                    |                                                                     |                                                   |                                                                 |                                                                 |         |
|                 |                           |                                         |          |        |                                                    | KO: 3.82±0.4004                                    | KO                                                 | Mann Whitney, two-tailed                                            | p=0.4752                                          | ns                                                              |                                                                 |         |
|                 |                           |                                         |          |        |                                                    | (2.223, 4.713)                                     |                                                    |                                                                     |                                                   |                                                                 |                                                                 |         |
| Figure 4e       | slice electrophysiology   | sPSC Pv amplitude                       | M        | 12wks  | WT: 23 neurons / 6 mice<br>KO: 28 neurons / 6 mice | WT: 37.77±1.957                                    | WT                                                 | Unpaired t test, two-tailed                                         | p=0.4752                                          | ns                                                              |                                                                 |         |
|                 |                           |                                         |          |        |                                                    | (34.65, 41.06)                                     |                                                    |                                                                     |                                                   |                                                                 |                                                                 |         |
|                 |                           |                                         |          |        |                                                    | KO: 38.00±1.547                                    | KO                                                 | Unpaired t test, two-tailed                                         | p=0.4752                                          | ns                                                              |                                                                 |         |
|                 |                           |                                         |          |        |                                                    | (34.65, 41.06)                                     |                                                    |                                                                     |                                                   |                                                                 |                                                                 |         |
| Figure 4f       | slice electrophysiology   | intrinsic excitability IO curve Pv      | M        | >12wks | WT: 24 neurons / 5 mice<br>KO: 19 neurons / 4 mice | WT: 0.000±0.000                                    | WT                                                 | Repeated measures of Two Way ANOVA with Bonferroni's test           | Interaction F (0.389) = 0.6008, P=0.7445          | WT vs KO                                                        |                                                                 |         |
|                 |                           |                                         |          |        |                                                    | KO: 0.000±0.000                                    | KO                                                 | Interaction F (0.389) = 0.6008, P=0.7445                            | WT vs KO                                          |                                                                 |                                                                 |         |
|                 |                           |                                         |          |        |                                                    | WT: 0.000±0.000                                    | WT                                                 | Interaction F (0.389) = 0.6008, P=0.7445                            | WT vs KO                                          |                                                                 |                                                                 |         |
|                 |                           |                                         |          |        |                                                    | KO: 0.000±0.000                                    | KO                                                 | Interaction F (0.389) = 0.6008, P=0.7445                            | WT vs KO                                          |                                                                 |                                                                 |         |
|                 |                           |                                         |          |        |                                                    | WT: 0.000±0.000                                    | WT                                                 | Interaction F (0.389) = 0.6008, P=0.7445                            | WT vs KO                                          |                                                                 |                                                                 |         |
|                 |                           |                                         |          |        |                                                    | KO: 0.000±0.000                                    | KO                                                 | Interaction F (0.389) = 0.6008, P=0.7445                            | WT vs KO                                          |                                                                 |                                                                 |         |
|                 |                           |                                         |          |        |                                                    | WT: 0.000±0.000                                    | WT                                                 | Interaction F (0.389) = 0.6008, P=0.7445                            | WT vs KO                                          |                                                                 |                                                                 |         |
|                 |                           |                                         |          |        |                                                    | KO: 0.000±0.000                                    | KO                                                 | Interaction F (0.389) = 0.6008, P=0.7445                            | WT vs KO                                          |                                                                 |                                                                 |         |
|                 |                           |                                         |          |        |                                                    | WT: 0.000±0.000                                    | WT                                                 | Interaction F (0.389) = 0.6008, P=0.7445                            | WT vs KO                                          |                                                                 |                                                                 |         |
|                 |                           |                                         |          |        |                                                    | KO: 0.000±0.000                                    | KO                                                 | Interaction F (0.389) = 0.6008, P=0.7445                            | WT vs KO                                          |                                                                 |                                                                 |         |
|                 |                           |                                         |          |        |                                                    | WT: 0.000±0.000                                    | WT                                                 | Interaction F (0.389) = 0.6008, P=0.7445                            | WT vs KO                                          |                                                                 |                                                                 |         |
|                 |                           |                                         |          |        |                                                    | KO: 0.000±0.000                                    | KO                                                 | Interaction F (0.389) = 0.6008, P=0.7445                            | WT vs KO                                          |                                                                 |                                                                 |         |

| Figure | Condition                                            | Stimulus                                 | Genotype | Age    | N                                                                                                                    | Measure        | Data                                                                                                                  |                                                                                                 | Stat                                                                      | Sig                                                                                                           | Notes                                                                                                                                              |
|--------|------------------------------------------------------|------------------------------------------|----------|--------|----------------------------------------------------------------------------------------------------------------------|----------------|-----------------------------------------------------------------------------------------------------------------------|-------------------------------------------------------------------------------------------------|---------------------------------------------------------------------------|---------------------------------------------------------------------------------------------------------------|----------------------------------------------------------------------------------------------------------------------------------------------------|
|        |                                                      |                                          |          |        |                                                                                                                      |                | WT                                                                                                                    | KO                                                                                              |                                                                           |                                                                                                               |                                                                                                                                                    |
| 4h     | slice electrophysiology with optogenetic stimulation | WT                                       | F        | >12wks | n=9/3                                                                                                                | WT-on          | off 2.642 ± 1.892                                                                                                     | off 2.844 (0.888, 1.282)                                                                        | Repeated measures of Two Way ANOVA with Tukey's test                      | Interaction F(2,7)=1.909, p=0.072<br>light F(2,15)=3.485, p=0.062<br>Hz F(2,7)=367, p<0.001                   | WT on vs off<br>25, P > 0.05<br>75, P > 0.05<br>125, P > 0.05<br>175, P > 0.05<br>225, P > 0.05<br>275, P > 0.05<br>325, P > 0.05<br>375, P > 0.05 |
|        |                                                      |                                          |          |        |                                                                                                                      |                | on 0.303 (0.1169, 0.490)                                                                                              | on 0.470 (0.3976, 0.543)                                                                        |                                                                           |                                                                                                               |                                                                                                                                                    |
| 4h     | slice electrophysiology                              | KO                                       | F        | >12wks | n=17/6                                                                                                               | KO-on          | off 4.958 ± 3.256                                                                                                     | off 1.965 (1.1031, 2.859)                                                                       | Repeated measures of Two Way ANOVA with Tukey's test                      | Interaction F(2,7)=0.467, p=0.858<br>light F(2,15)=0.636, p=0.431<br>Hz F(2,7)=886, p<0.001                   | KO on vs off<br>25, P > 0.05<br>75, P > 0.05<br>125, P > 0.05<br>175, P > 0.05<br>225, P > 0.05<br>275, P > 0.05<br>325, P > 0.05<br>375, P > 0.05 |
|        |                                                      |                                          |          |        |                                                                                                                      |                | on 0.799 ± 0.2639                                                                                                     | on 0.613 (0.3282, 1.503)                                                                        |                                                                           |                                                                                                               |                                                                                                                                                    |
| 4h     | slice electrophysiology                              | WT                                       | F        | >12wks | n=9/3                                                                                                                | WT-off         | off 1.393 ± 0.705                                                                                                     | off 14.526 (8.53, 19.22)                                                                        | Two-way repeated measures of ANOVA with Tukey's test                      | Interaction F(2,7)=1.929, p=0.072<br>light F(2,15)=3.485, p=0.062<br>Hz F(2,7)=367, p<0.001                   | ns                                                                                                                                                 |
|        |                                                      |                                          |          |        |                                                                                                                      |                | off 0.911 ± 0.347                                                                                                     | off 0.726 (0.2639, 0.910)                                                                       |                                                                           |                                                                                                               |                                                                                                                                                    |
| 4h     | slice electrophysiology                              | KO                                       | F        | >12wks | n=17/6                                                                                                               | KO-off         | off 0.582 ± 0.209                                                                                                     | off 0.582 (0.209, 0.955)                                                                        | Two-way repeated measures of ANOVA with Tukey's test                      | Interaction F(2,7)=1.929, p=0.072<br>light F(2,15)=3.485, p=0.062<br>Hz F(2,7)=367, p<0.001                   | ns                                                                                                                                                 |
|        |                                                      |                                          |          |        |                                                                                                                      |                | off 0.264 ± 0.118                                                                                                     | off 0.264 (0.095, 0.433)                                                                        |                                                                           |                                                                                                               |                                                                                                                                                    |
| 4h     | slice electrophysiology                              | WT                                       | F        | >12wks | n=9/3                                                                                                                | WT-off         | off 0.448 ± 0.289                                                                                                     | off 0.448 (0.289, 0.607)                                                                        | Two-way repeated measures of ANOVA with Tukey's test                      | Interaction F(2,7)=1.929, p=0.072<br>light F(2,15)=3.485, p=0.062<br>Hz F(2,7)=367, p<0.001                   | ns                                                                                                                                                 |
|        |                                                      |                                          |          |        |                                                                                                                      |                | off 0.104 ± 0.043                                                                                                     | off 0.104 (0.043, 0.165)                                                                        |                                                                           |                                                                                                               |                                                                                                                                                    |
| 4h     | slice electrophysiology                              | KO                                       | F        | >12wks | n=17/6                                                                                                               | KO-off         | off 0.264 ± 0.118                                                                                                     | off 0.264 (0.095, 0.433)                                                                        | Two-way repeated measures of ANOVA with Tukey's test                      | Interaction F(2,7)=1.929, p=0.072<br>light F(2,15)=3.485, p=0.062<br>Hz F(2,7)=367, p<0.001                   | ns                                                                                                                                                 |
|        |                                                      |                                          |          |        |                                                                                                                      |                | off 0.104 ± 0.043                                                                                                     | off 0.104 (0.043, 0.165)                                                                        |                                                                           |                                                                                                               |                                                                                                                                                    |
| 4h     | slice electrophysiology                              | WT                                       | F        | >12wks | n=9/3                                                                                                                | WT-off         | off 0.104 ± 0.043                                                                                                     | off 0.104 (0.043, 0.165)                                                                        | Two-way repeated measures of ANOVA with Tukey's test                      | Interaction F(2,7)=1.929, p=0.072<br>light F(2,15)=3.485, p=0.062<br>Hz F(2,7)=367, p<0.001                   | ns                                                                                                                                                 |
|        |                                                      |                                          |          |        |                                                                                                                      |                | off 0.062 ± 0.031                                                                                                     | off 0.062 (0.031, 0.093)                                                                        |                                                                           |                                                                                                               |                                                                                                                                                    |
| 4h     | slice electrophysiology                              | KO                                       | F        | >12wks | n=17/6                                                                                                               | KO-off         | off 0.062 ± 0.031                                                                                                     | off 0.062 (0.031, 0.093)                                                                        | Two-way repeated measures of ANOVA with Tukey's test                      | Interaction F(2,7)=1.929, p=0.072<br>light F(2,15)=3.485, p=0.062<br>Hz F(2,7)=367, p<0.001                   | ns                                                                                                                                                 |
|        |                                                      |                                          |          |        |                                                                                                                      |                | off 0.031 ± 0.015                                                                                                     | off 0.031 (0.015, 0.047)                                                                        |                                                                           |                                                                                                               |                                                                                                                                                    |
| 4h     | slice electrophysiology                              | WT                                       | F        | >12wks | n=9/3                                                                                                                | WT-off         | off 0.031 ± 0.015                                                                                                     | off 0.031 (0.015, 0.047)                                                                        | Two-way repeated measures of ANOVA with Tukey's test                      | Interaction F(2,7)=1.929, p=0.072<br>light F(2,15)=3.485, p=0.062<br>Hz F(2,7)=367, p<0.001                   | ns                                                                                                                                                 |
|        |                                                      |                                          |          |        |                                                                                                                      |                | off 0.015 ± 0.007                                                                                                     | off 0.015 (0.007, 0.022)                                                                        |                                                                           |                                                                                                               |                                                                                                                                                    |
| 4h     | slice electrophysiology                              | KO                                       | F        | >12wks | n=17/6                                                                                                               | KO-off         | off 0.015 ± 0.007                                                                                                     | off 0.015 (0.007, 0.022)                                                                        | Two-way repeated measures of ANOVA with Tukey's test                      | Interaction F(2,7)=1.929, p=0.072<br>light F(2,15)=3.485, p=0.062<br>Hz F(2,7)=367, p<0.001                   | ns                                                                                                                                                 |
|        |                                                      |                                          |          |        |                                                                                                                      |                | off 0.007 ± 0.003                                                                                                     | off 0.007 (0.003, 0.011)                                                                        |                                                                           |                                                                                                               |                                                                                                                                                    |
| 6a     | slice electrophysiology                              | Stimulated PV ratio diagram 10Hz         | M        | 12wks  | WT: 504 epochs / 8 mice<br>KO: 372 epochs / 12 mice                                                                  | Chi-square, df | 11.76, 2                                                                                                              | ns                                                                                              | Chi-square                                                                | p=0.0028                                                                                                      | ns                                                                                                                                                 |
|        |                                                      |                                          |          |        |                                                                                                                      |                | 11.29 ± 1.177                                                                                                         | 10.9 (167, 13.54)                                                                               |                                                                           |                                                                                                               |                                                                                                                                                    |
| 6b     | slice electrophysiology                              | Neighboring PV ratio diagram 10Hz        | M        | 12wks  | WT: 42 neurons / 8 mice<br>KO: 31 neurons / 12 mice<br>(Mean firing frequency)                                       | Chi-square, df | 185, 4                                                                                                                | ns                                                                                              | Mann Whitney test, two-tailed                                             | p=0.2961                                                                                                      | ns                                                                                                                                                 |
|        |                                                      |                                          |          |        |                                                                                                                      |                | 4.202 ± 0.9015                                                                                                        | (0.0, 10.00)                                                                                    |                                                                           |                                                                                                               |                                                                                                                                                    |
| 6c     | slice electrophysiology                              | Stimulated PV ratio diagram 4Hz          | M        | 12wks  | WT: 1536 epochs / 8 mice<br>KO: 1465 epochs / 12 mice<br>(Mean firing frequency)                                     | Chi-square, df | 0.599, 2                                                                                                              | ns                                                                                              | Chi-square                                                                | p=0.7524                                                                                                      | ns                                                                                                                                                 |
|        |                                                      |                                          |          |        |                                                                                                                      |                | 24.14 ± 3.304                                                                                                         | 32.06 (1.667, 40.00)                                                                            |                                                                           |                                                                                                               |                                                                                                                                                    |
| 6d     | slice electrophysiology                              | Neighboring PV ratio diagram 4Hz         | M        | 12wks  | WT: 504 epochs / 8 mice<br>KO: 456 epochs / 12 mice<br>(Mean firing frequency)                                       | Chi-square, df | 305, 2                                                                                                                | ns                                                                                              | Chi-square                                                                | p<0.0001                                                                                                      | ns                                                                                                                                                 |
|        |                                                      |                                          |          |        |                                                                                                                      |                | 11.98 ± 1.491                                                                                                         | 10.66 (6.67, 16.88)                                                                             |                                                                           |                                                                                                               |                                                                                                                                                    |
| 6e     | slice electrophysiology                              | 10Hz optoTM Neighboring PV Ratio diagram | M        | 12wks  | WT: 348 epochs / 13 mice<br>WT+MQ: 348 epochs / 13 mice                                                              | Chi-square, df | WT: 125 (0, 195.0, 24.0)<br>WT+MQ: 78 (248, 222)                                                                      | ns                                                                                              | Chi-square                                                                | p<0.0001                                                                                                      | ns                                                                                                                                                 |
|        |                                                      |                                          |          |        |                                                                                                                      |                | 5.563 ± 1.982                                                                                                         | (0.00, 2.983)                                                                                   |                                                                           |                                                                                                               |                                                                                                                                                    |
| 6f     | slice electrophysiology with optogenetic stimulation | 10Hz optoTM Neighboring PV Ratio diagram | M        | 12wks  | WT: 29 neurons / 13 mice<br>WT+MQ: 29 neurons / 13 mice<br>KO: 40 neurons / 13 mice<br>KO+MQ: 40 neurons / 13 mice   | Chi-square, df | KO: 104 (148, 48)<br>KO+MQ: 37 (261, 2)                                                                               | ns                                                                                              | Chi-square                                                                | p=0.0001                                                                                                      | ns                                                                                                                                                 |
|        |                                                      |                                          |          |        |                                                                                                                      |                | WT: 7.935 ± 1.172<br>WT+MQ: 4.276 ± 1.222<br>KO: 10.093 ± 1.598<br>KO+MQ: 1.873 ± 0.605                               | WT: 10.890 (10.903, 0)<br>WT+MQ: 0 (10.893, 0)<br>KO: 10.893 (13.760, 3.542)<br>KO+MQ: 0 (0, 0) |                                                                           |                                                                                                               |                                                                                                                                                    |
| 7a     | slice electrophysiology                              | NMDA to AMPA ratio                       | M        | 12wks  | WT: 19 neurons / 3 mice<br>KO: 13 neurons / 2 mice                                                                   | Chi-square, df | 1.330 ± 0.2630<br>0.5509 ± 0.08843                                                                                    | ns                                                                                              | Mann Whitney test, two-tailed                                             | p=0.0125                                                                                                      | ns                                                                                                                                                 |
|        |                                                      |                                          |          |        |                                                                                                                      |                | WT: 8.208 ± 1.080<br>KO: 6.882 ± 0.6885                                                                               | 5.267 (2.825, 8.483)<br>6.767 (5.254, 9.458)                                                    |                                                                           |                                                                                                               |                                                                                                                                                    |
| 7b     | slice electrophysiology                              | Py neuron mEPSC Amplitude                | M        | 12wks  | WT: 14 neurons / 4 mice<br>KO: 13 neurons / 4 mice                                                                   | Chi-square, df | 12.96 ± 1.474<br>12.61 (10.60, 21.23)                                                                                 | ns                                                                                              | Unpaired t test, two-tailed                                               | p=0.5114                                                                                                      | ns                                                                                                                                                 |
|        |                                                      |                                          |          |        |                                                                                                                      |                | WT: 12.96 ± 1.474<br>KO: 13 neurons / 4 mice                                                                          | 12.02 (10.40, 15.31)                                                                            |                                                                           |                                                                                                               |                                                                                                                                                    |
| 7c     | slice electrophysiology with optogenetic stimulation | 10Hz optoTM Neighboring PV Ratio diagram | M        | 12wks  | WT: 516 epochs / 18 mice<br>WT+DCS: 516 epochs / 18 mice                                                             | Chi-square, df | WT: 348 (205, 21)<br>WT+DCS: 178 (251, 87)                                                                            | ns                                                                                              | Chi-square                                                                | p=0.0001                                                                                                      | ns                                                                                                                                                 |
|        |                                                      |                                          |          |        |                                                                                                                      |                | WT: 43 neurons / 18 mice<br>WT+DCS: 43 neurons / 18 mice<br>KO: 38 neurons / 19 mice<br>KO+DCS: 38 neurons / 19 mice  | WT: 8.693 ± 0.693<br>WT+DCS: 8.692 ± 1.402<br>KO: 13.075 ± 1.743<br>KO+DCS: 18.158 ± 2.174      |                                                                           |                                                                                                               |                                                                                                                                                    |
| 7d     | slice electrophysiology with optogenetic stimulation | 10Hz optoTM Neighboring PV Ratio diagram | M        | 12wks  | WT: 43 neurons / 18 mice<br>WT+DCS: 43 neurons / 18 mice<br>KO: 38 neurons / 19 mice<br>KO+DCS: 38 neurons / 19 mice | Chi-square, df | WT: 8.970 (10.894, 0)<br>WT+DCS: 10.042 (16.195, 0)<br>KO: 10.893 (17.055, 10.431)<br>KO+DCS: 15.434 (21.659, 10.893) | ns                                                                                              | Two-way repeated measures of ANOVA with Sidak's multiple comparisons test | Interaction F(1, 79) = 3.494, p=0.0653<br>Drug F(1, 79) = 18.04, p<0.0001<br>Group F(1, 79) = 14.19, p<0.0003 | Veh-DCS<br>WT: ns (p=0.1654)<br>KO: ** (p<0.0001)                                                                                                  |

|           |                                                                                                        |                                           |   |        |                                                                                                                                              |                                                                                                                                          |                                                                                                                                                                                                                                                                                              |                                                                                                         |                                                                                                                                                                                                                                                                     |                                                                  |
|-----------|--------------------------------------------------------------------------------------------------------|-------------------------------------------|---|--------|----------------------------------------------------------------------------------------------------------------------------------------------|------------------------------------------------------------------------------------------------------------------------------------------|----------------------------------------------------------------------------------------------------------------------------------------------------------------------------------------------------------------------------------------------------------------------------------------------|---------------------------------------------------------------------------------------------------------|---------------------------------------------------------------------------------------------------------------------------------------------------------------------------------------------------------------------------------------------------------------------|------------------------------------------------------------------|
| figure 7d | Slice electrophysiology with optogenetic stimulation                                                   | 10Hz optoSTM Neighboring PV Ratio diagram | M | 12wks  | WT+DCS+Veh: 192 epochs / 10mice<br>WT+DCS+Mef: 240 epochs / 10mice                                                                           | Chi-square, df                                                                                                                           | WT+DCS+Veh: ACSF: 65 (121, 6) DCS: 54 (103, 30) Veh: 49 (109, 34)<br>WT+DCS+Mef: ACSF: 60 (232, 2) DCS: 67 (229, 28) Veh: 12 (312, 0)                                                                                                                                                        | Chi-square two-sided                                                                                    | WT+DCS+Veh: WT vs. DCS, p<0.0001 DCS vs. Veh, p=0.8077                                                                                                                                                                                                              | WT+DCS+Mef: WT vs. DCS, p<0.0001 DCS vs. Mef, p<0.0001           |
|           |                                                                                                        | 10Hz optoSTM Neighboring PV Ratio diagram | M | 12wks  | KO+DCS+Veh: 252 epochs / 12mice<br>KO+DCS+Mef: 240 epochs / 12mice                                                                           | Chi-square, df                                                                                                                           | KO+DCS+Veh: ACSF: 91 (114, 40) DCS: 91 (66, 46) Veh: 82 (150, 20)<br>KO+DCS+Mef: ACSF: 89 (147, 38) DCS: 70 (141, 29) Veh: 9 (279, 0)                                                                                                                                                        | Chi-square two-sided                                                                                    | KO+DCS+Veh: KO vs. DCS, p<0.0001 DCS vs. Veh, p=0.0001                                                                                                                                                                                                              | KO+DCS+Mef: KO vs. DCS, p<0.0001 DCS vs. Mef, p<0.0001           |
|           |                                                                                                        | 10Hz optoSTM Neighboring PV Firing rate   | M | 12wks  | WT+DCS+Veh: 16 neurons / 10 mice<br>WT+DCS+Mef: 27 neurons / 10 mice<br>KO+DCS+Veh: 21 neurons / 12 mice<br>KO+DCS+Mef: 20 neurons / 12 mice | Two-way repeated measures of ANOVA with Šidák's multiple comparisons test                                                                | WT+DCS+Veh: WT: 6.658 ± 1.544 DCS: 8.239 ± 3.568 Veh: 6.889 ± 2.285<br>WT+DCS+Mef: WT: 3.247 ± 0.942 DCS: 3.244 ± 1.748 Mef: 1.763 ± 1.763<br>KO+DCS+Veh: KO: 8.233 ± 1.834 DCS: 15.412 ± 3.371 Veh: 14.713 ± 4.201<br>KO+DCS+Mef: KO: 10.067 ± 1.340 DCS: 14.378 ± 1.615 Mef: 0.283 ± 4.038 | Two-way repeated measures of ANOVA with Šidák's multiple comparisons test                               | WT Interaction F (2, 82) = 0.9416 p=0.3942<br>Session F (1, 815, 74.42) = 3.401 p=0.0430<br>Treatment F (1, 41) = 2.347 p=0.1332<br>KO Interaction F (2, 78) = 17.66 p<0.0001<br>Session F (1, 544, 60.21) = 14.20 p<0.0001<br>Treatment F (1, 39) = 2.028 p=0.1628 | WT: Veh vs. Mef, ns (p=0.2340)<br>KO: Veh vs. Mef, ** (p=0.0086) |
| figure 8b | Three chamber test with optogenetic stimulation                                                        | Shank2 WT PV-cre; AAV-EYFP                | M | >12wks | m=15                                                                                                                                         | Social: pre:190.414.91 opto:154.7919.12 post:183927.17<br>Object: pre:43.1146.755 opto:45.4946.941 post:39.5648.08                       | Social: pre:196.6138.221.2 opto:157.0833.181.63 post:1179.74.262.9                                                                                                                                                                                                                           | Two-way repeated measures of ANOVA with Tukey's test                                                    | Interaction F(2,56)=1.353, p=0.2667<br>light F(2,56)=0.813, p=0.4199<br>target F(1,28)=62.58, p<0.0001                                                                                                                                                              |                                                                  |
|           |                                                                                                        | Shank2 KO PV-cre; AAV-EYFP                | M | >12wks | m=11                                                                                                                                         | Social: pre:109.8415.92 opto:66.4411.12 post:86.0416.75<br>Object: pre:27.1843.323 opto:38.2646.741 post:36.8844.87                      | Social: pre:105.365.45, 159.8 opto:103.6414.140.3 post:79.9161.36, 113.7                                                                                                                                                                                                                     | Two-way repeated measures of ANOVA with Tukey's test                                                    | Interaction F(2,10)=1.296, p=0.2849<br>light F(2,10)=0.2686, p=0.7658<br>target F(1,20)=26.45, p<0.0001                                                                                                                                                             |                                                                  |
| figure 8c | Three chamber test with optogenetic stimulation                                                        | Shank2 WT PV-cre; AAV-ChR2                | M | >12wks | m=20                                                                                                                                         | Social: pre:210.4412 opto:233.7415.99 post:193.1311.69<br>Object: pre:42.2345.975 opto:44.8347.566 post:52.1148.427                      | Social: pre:202.44181.9, 253 opto:246.2162.3, 207.63 post:193.165.6, 221.6                                                                                                                                                                                                                   | Two-way repeated measures of ANOVA with Tukey's test                                                    | Interaction F(2,78)=4.098, p=0.0204<br>light F(2,78)=0.775, p=0.005<br>target F(1,39)=210, p<0.0001                                                                                                                                                                 |                                                                  |
|           |                                                                                                        | Shank2 KO PV-cre; AAV-ChR2                | M | >12wks | m=16                                                                                                                                         | Social: pre:101.8410.91 opto:161.6421.33 post:116.1416.87<br>Object: pre:32.1344.116 opto:48.1348.356 post:39.447.605                    | Social: pre:105.600.54, 137.6 opto:101.401.21, 254.11 post:95.4872.08, 162.8                                                                                                                                                                                                                 | Two-way repeated measures of ANOVA with Tukey's test                                                    | Interaction F(2,60)=2.649, p=0.0790<br>light F(2,60)=0.775, p=0.005<br>target F(1,30)=54.41, p<0.0001                                                                                                                                                               |                                                                  |
| figure 8d | Three chamber test with optogenetic stimulation                                                        | Shank2 WT PV-cre; AAV-ChETA               | M | >12wks | m=8                                                                                                                                          | Social: pre:174.9424.44 opto:198.3919.04 post:173.323.92<br>Object: pre:61.6848.005 opto:46.9248.674 post:37.4247.723                    | Social: pre:197.2161.5, 216.2 opto:198.8177.4, 228.71 post:165.6110.8, 197                                                                                                                                                                                                                   | Two-way repeated measures of ANOVA with Tukey's test                                                    | Interaction F(2,28)=0.0775, p=0.9296<br>light F(2,28)=0.143, p=0.5333<br>target F(1,14)=50.6, p<0.0001                                                                                                                                                              |                                                                  |
|           |                                                                                                        | Shank2 KO PV-cre; AAV-ChETA               | M | >12wks | m=10                                                                                                                                         | Social: pre:133.619.47 opto:166.6312.24 post:97.3240.75<br>Object: pre:28.1445.121 opto:34.2144.609 post:36.0745.855                     | Social: pre:137.373.69, 192.6 opto:160.271.8, 126.6 post:64.5505.95, 143.4                                                                                                                                                                                                                   | Two-way repeated measures of ANOVA with Tukey's test                                                    | Interaction F(2,36)=1.653, p=0.2057<br>light F(2,36)=0.377, p=0.6851<br>target F(1,18)=27.73, p<0.0001                                                                                                                                                              |                                                                  |
| figure 8e | Three chamber test with optogenetic stimulation                                                        | Shank2 WT PV-cre; AAV-SSFO                | M | >12wks | m=15                                                                                                                                         | Social: pre:172.1155 opto:172.724.37 post:178.1258.02<br>Object: pre:79.6347.78 opto:94.4716.69 post:79.4415.6                           | Social: pre:184.1137.8, 198.9 opto:177.2074.47, 243.4 post:165.7427.6, 233                                                                                                                                                                                                                   | Two-way repeated measures of ANOVA with Tukey's test                                                    | Interaction F(2,56)=0.2196, p=0.7<br>light F(2,56)=0.122, p=0.8851<br>target F(1,28)=27.31, p<0.0001                                                                                                                                                                |                                                                  |
|           |                                                                                                        | Shank2 KO PV-cre; AAV-SSFO                | M | >12wks | m=14                                                                                                                                         | Social: pre:88.4849.674 opto:93.6610.84 post:81.6815.69<br>Object: pre:37.1144.903 opto:44.0548.792 post:44.1145.944                     | Social: pre:80.3161.69, 117.7 opto:84.16010.14, 128.1 post:55.8134.62, 133.8                                                                                                                                                                                                                 | Two-way repeated measures of ANOVA with Tukey's test                                                    | Interaction F(2,54)=0.333, p=0.7180<br>light F(2,54)=0.377, p=0.6851<br>target F(1,28)=23.41, p<0.0001                                                                                                                                                              |                                                                  |
| Figure 8h | in vivo recording with optogenetic stimulation; Shank2 KO PV-cre; AAV-EYFP; Shank2 WT PV-cre; AAV-ChR2 | S-specific                                | M | >12wks | Target                                                                                                                                       | EYFP-163 neurons/4 mice<br>ChR2-364 neurons/9 mice                                                                                       | EYFP n=181, T: 1.83                                                                                                                                                                                                                                                                          | Chi-square test two-sided                                                                               | p=0.0691                                                                                                                                                                                                                                                            | ns                                                               |
|           |                                                                                                        |                                           |   |        | Side                                                                                                                                         | EYFP-163 neurons/4 mice<br>ChR2-364 neurons/9 mice                                                                                       | EYFP n=121, Si: 42<br>ChR2 n=256, Si: 68                                                                                                                                                                                                                                                     | Chi-square test two-sided                                                                               | p=0.0643                                                                                                                                                                                                                                                            | ns                                                               |
|           |                                                                                                        |                                           |   |        | S-specific                                                                                                                                   | EYFP-163 neurons/4 mice<br>ChR2-364 neurons/9 mice                                                                                       | EYFP n=150, S: 13<br>ChR2 n=336, S: 25                                                                                                                                                                                                                                                       | Chi-square test two-sided                                                                               | p=0.786                                                                                                                                                                                                                                                             | ns                                                               |
|           |                                                                                                        |                                           |   |        | O-specific                                                                                                                                   | EYFP-163 neurons/4 mice<br>ChR2-364 neurons/9 mice                                                                                       | EYFP n=148, D: 15<br>ChR2 n=347, D: 17                                                                                                                                                                                                                                                       | Chi-square test two-sided                                                                               | p=0.0441                                                                                                                                                                                                                                                            | *                                                                |
|           |                                                                                                        | E-specific                                | M | >12wks | Target                                                                                                                                       | EYFP-163 neurons/4 mice<br>ChR2-364 neurons/9 mice                                                                                       | EYFP n=118, E: 45<br>ChR2 n=376, E: 27                                                                                                                                                                                                                                                       | Chi-square test two-sided                                                                               | p=0.702                                                                                                                                                                                                                                                             | ns                                                               |
|           |                                                                                                        |                                           |   |        | Side                                                                                                                                         | EYFP-194 neurons/7 mice<br>ChR2-72 neurons/8 mice                                                                                        | EYFP n=113, T: 46<br>ChR2 n=28, T: 44                                                                                                                                                                                                                                                        | Chi-square test two-sided                                                                               | p=0.552                                                                                                                                                                                                                                                             | ns                                                               |
|           |                                                                                                        |                                           |   |        | S-specific                                                                                                                                   | EYFP-194 neurons/7 mice<br>ChR2-72 neurons/8 mice                                                                                        | EYFP n=154, Si: 44<br>ChR2 n=126, Si: 46                                                                                                                                                                                                                                                     | Chi-square test two-sided                                                                               | p=0.0213                                                                                                                                                                                                                                                            | *                                                                |
|           |                                                                                                        |                                           |   |        | O-specific                                                                                                                                   | EYFP-194 neurons/7 mice<br>ChR2-72 neurons/8 mice                                                                                        | EYFP n=189, S: 14<br>ChR2 n=169, S: 12                                                                                                                                                                                                                                                       | Chi-square test two-sided                                                                               | p=0.0181                                                                                                                                                                                                                                                            | *                                                                |
|           |                                                                                                        | E-specific                                | M | >12wks | Target                                                                                                                                       | EYFP-194 neurons/7 mice<br>ChR2-72 neurons/8 mice                                                                                        | EYFP n=189, D: 9<br>ChR2 n=169, D: 9                                                                                                                                                                                                                                                         | Chi-square test two-sided                                                                               | p=0.894                                                                                                                                                                                                                                                             | ns                                                               |
|           |                                                                                                        |                                           |   |        | Side                                                                                                                                         | EYFP-194 neurons/7 mice<br>ChR2-72 neurons/8 mice                                                                                        | EYFP n=173, E: 25<br>ChR2 n=164, E: 8                                                                                                                                                                                                                                                        | Chi-square test two-sided                                                                               | p=0.737                                                                                                                                                                                                                                                             | ns                                                               |
|           |                                                                                                        |                                           |   |        | S-specific                                                                                                                                   | Shank2 KO PV-cre; AAV-EYFP                                                                                                               | m=163/4                                                                                                                                                                                                                                                                                      | Chi-square test two-sided                                                                               | p=0.0284                                                                                                                                                                                                                                                            | *                                                                |
|           |                                                                                                        |                                           |   |        | O-specific                                                                                                                                   | Shank2 KO PV-cre; AAV-ChR2                                                                                                               | m=36/9                                                                                                                                                                                                                                                                                       | Chi-square test two-sided                                                                               | p=0.0284                                                                                                                                                                                                                                                            | *                                                                |
| figure 8i | in vivo recording with optogenetic stimulation                                                         | Theta                                     | M | >12wks | WT EYFP n=197<br>WT ChR2 n=63<br>KO EYFP n=186<br>KO ChR2 n=259                                                                              | WT EYFP 0.14020(0.9153, 0.2015)<br>WT ChR2 0.15070(0.8120, 0.9413)<br>KO EYFP 0.14300(1.0000, 0.2451)<br>KO ChR2 0.13480(0.8931, 0.1782) | Two-way repeated measures of ANOVA with Tukey's test                                                                                                                                                                                                                                         | Interaction F(1,760)=12.99, p=0.0003<br>Genotype F(2,760)=1.92, p=0.17<br>vns F(2,760)=1.6, p=0.7       |                                                                                                                                                                                                                                                                     |                                                                  |
|           |                                                                                                        | Alpha                                     | M | >12wks | WT EYFP n=197<br>WT ChR2 n=63<br>KO EYFP n=186<br>KO ChR2 n=259                                                                              | WT EYFP 0.13130(0.7116, 0.1629)<br>WT ChR2 0.12480(0.9650, 0.2508)<br>KO EYFP 0.12700(1.000, 0.2245)<br>KO ChR2 0.11840(0.9779, 0.1645)  | Two-way repeated measures of ANOVA with Tukey's test                                                                                                                                                                                                                                         | Interaction F(1,760)=23.11, p=0.0000<br>Genotype F(2,760)=3.3, p=0.036<br>vns F(2,760)=0.01, p=0.939    |                                                                                                                                                                                                                                                                     |                                                                  |
|           |                                                                                                        | Low gamma                                 | M | >12wks | WT EYFP n=197<br>WT ChR2 n=63<br>KO EYFP n=186<br>KO ChR2 n=259                                                                              | WT EYFP 0.09630(0.9350, 0.0824)<br>WT ChR2 0.07100(0.8418, 0.1219)<br>KO EYFP 0.06110(0.0476, 0.0957)<br>KO ChR2 0.04520(0.0289, 0.0719) | Two-way repeated measures of ANOVA with Tukey's test                                                                                                                                                                                                                                         | Interaction F(1,760)=38.13, p=0.0000<br>Genotype F(2,760)=3.3, p=0.036<br>vns F(2,760)=0.01, p=0.939    |                                                                                                                                                                                                                                                                     |                                                                  |
|           |                                                                                                        | High gamma                                | M | >12wks | WT EYFP n=197<br>WT ChR2 n=63<br>KO EYFP n=186<br>KO ChR2 n=259                                                                              | WT EYFP 0.08620(0.6011, 0.1450)<br>WT ChR2 0.09560(0.5040, 0.1965)<br>KO EYFP 0.08480(0.8018, 0.1565)<br>KO ChR2 0.06200(0.9778, 0.0969) | Two-way repeated measures of ANOVA with Tukey's test                                                                                                                                                                                                                                         | Interaction F(1,760)=30.08, p=0.0000<br>Genotype F(2,760)=14.92, p<0.0001<br>vns F(2,760)=5.04, p=0.025 |                                                                                                                                                                                                                                                                     |                                                                  |
| figure 9c | Three chamber test with MO local infusion                                                              | WT_Veh sniffing time                      | M | >12wks | m=11                                                                                                                                         | Social: 169.9419.87<br>Object: 48.9648.045<br>Social: 154.8416.95                                                                        | Social: 163.4 (214.1, 225.8)<br>Object: 39.74 (20.78, 54.08)<br>Social: 158.7 (118.6, 201.2)                                                                                                                                                                                                 | Two-way repeated measures of ANOVA                                                                      | Interaction F (1, 10) = 0.1640, p=0.6940<br>Treatment F (1, 10) = 1.384, p=0.2687<br>Target F (1, 10) = 46.88, p<0.0001                                                                                                                                             |                                                                  |
|           |                                                                                                        | WT_MO sniffing time                       | M | >12wks | m=8                                                                                                                                          | Social: 133.8415.37<br>Object: 46.9948.362<br>Social: 137.5414.23                                                                        | Social: 37.78 (20.19, 71.6)<br>Object: 37.39 (20.28, 64.65)<br>Social: 144.2 (66.12, 173.7)                                                                                                                                                                                                  | Two-way repeated measures of ANOVA                                                                      | Interaction F (1, 7) = 0.5622, p=0.4778<br>Treatment F (1, 7) = 1.640, p=0.2017<br>Target F (1, 7) = 50.58, p<0.0002                                                                                                                                                |                                                                  |
|           |                                                                                                        | KO_Veh sniffing time                      | M | >12wks | m=11                                                                                                                                         | Social: 148.8147.57<br>Object: 46.9948.362<br>Social: 137.5414.23                                                                        | Social: 108.7 (71.37, 168.3)<br>Object: 46.99 (20.28, 64.65)<br>Social: 144.2 (66.12, 173.7)                                                                                                                                                                                                 | Two-way repeated measures of ANOVA                                                                      | Interaction F (1, 7) = 0.5622, p=0.4778<br>Treatment F (1, 7) = 1.640, p=0.2017<br>Target F (1, 7) = 50.58, p<0.0002                                                                                                                                                |                                                                  |
|           |                                                                                                        | KO_MO sniffing time                       | M | >12wks | m=8                                                                                                                                          | Social: 148.8147.57<br>Object: 46.9948.362<br>Social: 137.5414.23                                                                        | Social: 108.7 (71.37, 168.3)<br>Object: 46.99 (20.28, 64.65)<br>Social: 144.2 (66.12, 173.7)                                                                                                                                                                                                 | Two-way repeated measures of ANOVA                                                                      | Interaction F (1, 7) = 0.5622, p=0.4778<br>Treatment F (1, 7) = 1.640, p=0.2017<br>Target F (1, 7) = 50.58, p<0.0002                                                                                                                                                |                                                                  |
|           |                                                                                                        | WT preference index                       | M | >12wks | m=11                                                                                                                                         | Vehicle: 0.542540.0596<br>MO: 0.585240.0562                                                                                              | Vehicle: 0.6253 (0.4025, 0.7057)<br>MO: 0.4539 (0.4119, 0.7527)                                                                                                                                                                                                                              | Two-way repeated measures of ANOVA                                                                      | Interaction F (1, 17) = 0.1441, p=0.7082<br>Genotype F (1, 17) = 1.327, p=0.2653<br>Treatment F (1, 17) = 0.1205, p=0.7327                                                                                                                                          |                                                                  |
|           |                                                                                                        | KO preference index                       | M | >12wks | m=8                                                                                                                                          | Vehicle: 0.477540.0706<br>MO: 0.477540.0706                                                                                              | Vehicle: 0.3207 (0.232, 0.5075)<br>MO: 0.4803 (0.3223, 0.5709)                                                                                                                                                                                                                               | Two-way repeated measures of ANOVA                                                                      | Interaction F (1, 17) = 0.1441, p=0.7082<br>Genotype F (1, 17) = 1.327, p=0.2653<br>Treatment F (1, 17) = 0.1205, p=0.7327                                                                                                                                          |                                                                  |

| Figure                         | Assay Performed                                | Parameter                    | Comparison                       |                              | n                                  | Descriptive Statistics                                                                                             |                                                                                                                     | Statistical Test | Significance | Summary |  |
|--------------------------------|------------------------------------------------|------------------------------|----------------------------------|------------------------------|------------------------------------|--------------------------------------------------------------------------------------------------------------------|---------------------------------------------------------------------------------------------------------------------|------------------|--------------|---------|--|
|                                |                                                |                              | WT                               | KO                           |                                    | Average ± SEM                                                                                                      | Median (Q1, Q3)                                                                                                     |                  |              |         |  |
| Figure 4d                      | Three chamber test with knockdown-36 knockdown | shRNA1 Control snifling time | n=8                              | Social: 230.4 (137.3, 295.3) | Social: 230.4 (137.3, 295.3)       | Two-way repeated measures of ANOVA                                                                                 | Interaction F (1, 15) = 1.541, p=0.2238; Treatment F (1, 15) = 0.8851, p=0.3617; Target F (1, 15) = 130.4, p<0.0001 |                  |              |         |  |
|                                |                                                |                              |                                  | Object: 45.962±0.649         | Object: 46.71 (41.46, 51.91)       |                                                                                                                    |                                                                                                                     |                  |              |         |  |
|                                |                                                | shRNA1 Preference index      | n=9                              | Control: n=8                 | Control: 0.6229±0.0206             | Control: 0.6474 (0.5708, 0.6779)                                                                                   | Mann Whitney test, two-tailed                                                                                       | p=0.0274         |              |         |  |
|                                |                                                |                              |                                  | Knockdown: n=9               | Knockdown: 0.7048±0.0278           | Knockdown: 0.6761 (0.6133, 0.8334)                                                                                 |                                                                                                                     |                  |              |         |  |
| shRNA2 Control snifling time   | n=10                                           | Social: 199.214±0.5          | Social: 199.214±0.5              | Social: 199.5 (165.5, 228.9) | Two-way repeated measures of ANOVA | Interaction F (1, 18) = 2.577, p=0.1258; Treatment F (1, 18) = 5.528, p=0.0303; Target F (1, 18) = 155.7, p<0.0001 |                                                                                                                     |                  |              |         |  |
|                                |                                                | Object: 56.964±0.786         | Object: 53.58 (41.12, 73.93)     |                              |                                    |                                                                                                                    |                                                                                                                     |                  |              |         |  |
| shRNA2 Knockdown snifling time | n=10                                           | Social: 261.6±0.82           | Social: 261.6±0.82               | Social: 261.2 (228.1, 298.7) | Unpaired t test, two-tailed        | p=0.3869                                                                                                           |                                                                                                                     |                  |              |         |  |
|                                |                                                | Object: 57.27±0.442          | Object: 48.79 (38.59, 61.93)     |                              |                                    |                                                                                                                    |                                                                                                                     |                  |              |         |  |
| shRNA2 Preference index        | Control: n=10<br>Knockdown: n=10               | Control: 0.5491±0.0514       | Control: 0.5428 (0.4253, 0.7151) | Knockdown: 0.6176±0.0573     | Knockdown: 0.6486 (0.4757, 0.7476) |                                                                                                                    |                                                                                                                     |                  |              |         |  |
|                                |                                                | Object: 261.6±0.82           | Object: 48.79 (38.59, 61.93)     |                              |                                    |                                                                                                                    |                                                                                                                     |                  |              |         |  |

| Figure                                                          | Assay Performed     | Parameter                                                       | Comparison              |                         | n                       | Descriptive Statistics  |                                                      | Statistical Test                                              | Significance                                                                                                   | Summary                                                                          |                                                                                 |
|-----------------------------------------------------------------|---------------------|-----------------------------------------------------------------|-------------------------|-------------------------|-------------------------|-------------------------|------------------------------------------------------|---------------------------------------------------------------|----------------------------------------------------------------------------------------------------------------|----------------------------------------------------------------------------------|---------------------------------------------------------------------------------|
|                                                                 |                     |                                                                 | WT                      | KO                      |                         | Average ± SEM           | Median (Q1, Q3)                                      |                                                               |                                                                                                                |                                                                                  |                                                                                 |
| Supplementary Figure 1c                                         | Linear chamber test | 1st SO                                                          | M                       | >12wks                  | n=5                     | WT: 0.189±0.137         | WT: 0.189±0.137                                      | Two-way repeated measures of ANOVA with Tukey's test          | Interaction F(1, 112)=11.13, p=0.0012; genotype F(1, 112)=1271.071, p<0.0001; target F(1, 112)=2.665, p=0.3030 | WT<br>E.R. vs. C.R. p=0.7282<br>E.R. vs. S.R. p=0.0309<br>C.R. vs. S.R. p=0.0738 |                                                                                 |
|                                                                 |                     |                                                                 |                         |                         |                         | KO: 0.136±0.137         | KO: 0.136±0.137                                      |                                                               |                                                                                                                |                                                                                  |                                                                                 |
| Supplementary Figure 1d                                         | Linear chamber test | WT                                                              | M                       | >12wks                  | n=5                     | E-E: 0.494±0.0304       | E-E: 0.494±0.0304                                    | Friedman test with Dunn's test<br>p=0.0277, post-hoc p=0.0005 | E-E vs. 1stSO p=0.0001<br>E-E vs. 2ndSO p=0.0287<br>1stSO vs. 2ndSO p=0.3160                                   | WT<br>E.R. vs. C.R. p=0.892<br>E.R. vs. S.R. p=0.0263<br>C.R. vs. S.R. p=0.0738  |                                                                                 |
|                                                                 |                     |                                                                 |                         |                         |                         | E-S: 0.482±0.02585      | E-S: 0.482±0.02585                                   |                                                               |                                                                                                                |                                                                                  |                                                                                 |
| Supplementary Figure 3c                                         | Linear Chamber      | Relative burst firing in p16 neurons<br>burst criteria: < 6 ms  | M                       | 12wks                   | neuron n=36 / mice n=5  | WT                      | E.R.: 0.00326±0.00016                                | E.R.: 0.00326±0.00016                                         | Two-way repeated measures of ANOVA with Tukey's test                                                           | Interaction p=0.1475<br>target p=0.0032<br>genotype p=1.255                      | WT<br>E.R. vs. C.R. p=0.782<br>E.R. vs. S.R. p=0.0269<br>C.R. vs. S.R. p=0.1785 |
|                                                                 |                     |                                                                 |                         |                         |                         | KO                      | E.R.: 0.00101±0.00033                                | E.R.: 0.00101±0.00033                                         |                                                                                                                |                                                                                  |                                                                                 |
|                                                                 |                     |                                                                 |                         |                         |                         | neuron n=40 / mice n=5  | E.R.: 0.0140±0.00325                                 | E.R.: 0.0140±0.00325                                          |                                                                                                                |                                                                                  |                                                                                 |
|                                                                 |                     |                                                                 |                         |                         |                         | WT                      | E.R.: 0.00237±0.002567                               | E.R.: 0.00237±0.002567                                        |                                                                                                                |                                                                                  |                                                                                 |
|                                                                 |                     |                                                                 |                         |                         |                         | KO                      | E.R.: 0.0194±0.00705                                 | E.R.: 0.0194±0.00705                                          |                                                                                                                |                                                                                  |                                                                                 |
|                                                                 |                     |                                                                 |                         |                         |                         | neuron n=36 / mice n=5  | E.R.: 0.012±0.0094                                   | E.R.: 0.012±0.0094                                            |                                                                                                                |                                                                                  |                                                                                 |
|                                                                 |                     | Relative burst firing in p16 neurons<br>burst criteria: < 12 ms | M                       | 12wks                   | neuron n=40 / mice n=5  | WT                      | E.R.: 0.00297±0.00096                                | E.R.: 0.00297±0.00096                                         | Two-way repeated measures of ANOVA with Tukey's test                                                           | Interaction p=0.235<br>target p=0.036<br>genotype p=0.0094                       | WT<br>E.R. vs. C.R. p=0.892<br>E.R. vs. S.R. p=0.0263<br>C.R. vs. S.R. p=0.0738 |
|                                                                 |                     |                                                                 |                         |                         |                         | KO                      | E.R.: 0.013±0.00270                                  | E.R.: 0.013±0.00270                                           |                                                                                                                |                                                                                  |                                                                                 |
|                                                                 |                     |                                                                 |                         |                         |                         | neuron n=40 / mice n=5  | E.R.: 0.0033±0.000909                                | E.R.: 0.0033±0.000909                                         |                                                                                                                |                                                                                  |                                                                                 |
|                                                                 |                     |                                                                 |                         |                         |                         | WT                      | E.R.: 0.0080±0.01518                                 | E.R.: 0.0080±0.01518                                          |                                                                                                                |                                                                                  |                                                                                 |
|                                                                 |                     |                                                                 |                         |                         |                         | KO                      | E.R.: 0.0039±0.02002                                 | E.R.: 0.0039±0.02002                                          |                                                                                                                |                                                                                  |                                                                                 |
|                                                                 |                     |                                                                 |                         |                         |                         | neuron n=36 / mice n=5  | E.R.: 0.0031±0.01981                                 | E.R.: 0.0031±0.01981                                          |                                                                                                                |                                                                                  |                                                                                 |
| Relative burst firing in p16 neurons<br>burst criteria: < 24 ms | M                   | 12wks                                                           | neuron n=40 / mice n=5  | WT                      | E.R.: 0.0066±0.01596    | E.R.: 0.0066±0.01596    | Two-way repeated measures of ANOVA with Tukey's test | Interaction p=0.282<br>target p=0.011<br>genotype p=0.002     | WT<br>E.R. vs. C.R. p=0.0086<br>E.R. vs. S.R. p=0.5131<br>C.R. vs. S.R. p=0.4912                               |                                                                                  |                                                                                 |
|                                                                 |                     |                                                                 |                         | KO                      | E.R.: 0.018±0.01567     | E.R.: 0.018±0.01567     |                                                      |                                                               |                                                                                                                |                                                                                  |                                                                                 |
|                                                                 |                     |                                                                 |                         | neuron n=40 / mice n=5  | E.R.: 0.0063±0.01565    | E.R.: 0.0063±0.01565    |                                                      |                                                               |                                                                                                                |                                                                                  |                                                                                 |
|                                                                 |                     |                                                                 |                         | WT                      | E.R.: 0.0080±0.01518    | E.R.: 0.0080±0.01518    |                                                      |                                                               |                                                                                                                |                                                                                  |                                                                                 |
|                                                                 |                     |                                                                 |                         | KO                      | E.R.: 0.0039±0.02002    | E.R.: 0.0039±0.02002    |                                                      |                                                               |                                                                                                                |                                                                                  |                                                                                 |
|                                                                 |                     |                                                                 |                         | neuron n=36 / mice n=5  | E.R.: 0.0031±0.01981    | E.R.: 0.0031±0.01981    |                                                      |                                                               |                                                                                                                |                                                                                  |                                                                                 |
| Supplementary Figure 3d                                         | Linear Chamber      | Relative burst firing in p16 neurons<br>burst criteria: < 6 ms  | M                       | 12wks                   | neuron n=271 / mice n=5 | WT                      | E.R.: 0.0080±0.01518                                 | E.R.: 0.0080±0.01518                                          | Two-way repeated measures of ANOVA with Tukey's test                                                           | Interaction p=0.832<br>target p=0.676<br>genotype p=0.8945                       | WT<br>E.R. vs. C.R. p=0.9159<br>E.R. vs. S.R. p=0.775<br>C.R. vs. S.R. p=0.8274 |
|                                                                 |                     |                                                                 |                         |                         |                         | KO                      | E.R.: 0.011±0.00659                                  | E.R.: 0.011±0.00659                                           |                                                                                                                |                                                                                  |                                                                                 |
|                                                                 |                     |                                                                 |                         |                         |                         | neuron n=16 / mice n=5  | E.R.: 0.010±0.00942                                  | E.R.: 0.010±0.00942                                           |                                                                                                                |                                                                                  |                                                                                 |
|                                                                 |                     |                                                                 |                         |                         |                         | WT                      | E.R.: 0.017±0.00728                                  | E.R.: 0.017±0.00728                                           |                                                                                                                |                                                                                  |                                                                                 |
|                                                                 |                     |                                                                 |                         |                         |                         | KO                      | E.R.: 0.00967±0.00746                                | E.R.: 0.00967±0.00746                                         |                                                                                                                |                                                                                  |                                                                                 |
|                                                                 |                     |                                                                 |                         |                         |                         | neuron n=271 / mice n=5 | E.R.: 0.00718±0.00909                                | E.R.: 0.00718±0.00909                                         |                                                                                                                |                                                                                  |                                                                                 |
|                                                                 |                     | Relative burst firing in p16 neurons<br>burst criteria: < 12 ms | M                       | 12wks                   | neuron n=316 / mice n=5 | WT                      | E.R.: 0.0194±0.00334                                 | E.R.: 0.0194±0.00334                                          | Two-way repeated measures of ANOVA with Tukey's test                                                           | Interaction p=0.388<br>target p=0.407<br>genotype p=0.957                        | WT<br>E.R. vs. C.R. p=0.9956<br>E.R. vs. S.R. p=0.999<br>C.R. vs. S.R. p=0.999  |
|                                                                 |                     |                                                                 |                         |                         |                         | KO                      | E.R.: 0.019±0.00942                                  | E.R.: 0.019±0.00942                                           |                                                                                                                |                                                                                  |                                                                                 |
|                                                                 |                     |                                                                 |                         |                         |                         | neuron n=316 / mice n=5 | E.R.: 0.019±0.00942                                  | E.R.: 0.019±0.00942                                           |                                                                                                                |                                                                                  |                                                                                 |
|                                                                 |                     |                                                                 |                         |                         |                         | WT                      | E.R.: 0.019±0.00942                                  | E.R.: 0.019±0.00942                                           |                                                                                                                |                                                                                  |                                                                                 |
|                                                                 |                     |                                                                 |                         |                         |                         | KO                      | E.R.: 0.019±0.00942                                  | E.R.: 0.019±0.00942                                           |                                                                                                                |                                                                                  |                                                                                 |
|                                                                 |                     |                                                                 |                         |                         |                         | neuron n=271 / mice n=5 | E.R.: 0.019±0.00942                                  | E.R.: 0.019±0.00942                                           |                                                                                                                |                                                                                  |                                                                                 |
| Relative burst firing in p16 neurons<br>burst criteria: < 24 ms | M                   | 12wks                                                           | neuron n=316 / mice n=5 | WT                      | E.R.: 0.019±0.00942     | E.R.: 0.019±0.00942     | Two-way repeated measures of ANOVA with Tukey's test | Interaction p=0.628<br>target p=0.5874<br>genotype p=0.9461   | WT<br>E.R. vs. C.R. p=0.889<br>E.R. vs. S.R. p=0.633<br>C.R. vs. S.R. p=0.3846                                 |                                                                                  |                                                                                 |
|                                                                 |                     |                                                                 |                         | KO                      | E.R.: 0.019±0.00942     | E.R.: 0.019±0.00942     |                                                      |                                                               |                                                                                                                |                                                                                  |                                                                                 |
|                                                                 |                     |                                                                 |                         | neuron n=316 / mice n=5 | E.R.: 0.019±0.00942     | E.R.: 0.019±0.00942     |                                                      |                                                               |                                                                                                                |                                                                                  |                                                                                 |
|                                                                 |                     |                                                                 |                         | WT                      | E.R.: 0.019±0.00942     | E.R.: 0.019±0.00942     |                                                      |                                                               |                                                                                                                |                                                                                  |                                                                                 |
|                                                                 |                     |                                                                 |                         | KO                      | E.R.: 0.019±0.00942     | E.R.: 0.019±0.00942     |                                                      |                                                               |                                                                                                                |                                                                                  |                                                                                 |
|                                                                 |                     |                                                                 |                         | neuron n=316 / mice n=5 | E.R.: 0.019±0.00942     | E.R.: 0.019±0.00942     |                                                      |                                                               |                                                                                                                |                                                                                  |                                                                                 |
| Supplementary Figure 3e                                         | Linear Chamber      | Relative burst firing in p16 neurons<br>burst criteria: < 12 ms | M                       | 12wks                   | neuron n=271 / mice n=5 | WT                      | E.R.: 0.019±0.00942                                  | E.R.: 0.019±0.00942                                           | Two-way repeated measures of ANOVA with Tukey's test                                                           | Interaction p=0.7427<br>target p=0.9058<br>genotype p=0.3082                     | WT<br>E.R. vs. C.R. p=0.8181<br>E.R. vs. S.R. p=0.687<br>C.R. vs. S.R. p=0.488  |
|                                                                 |                     |                                                                 |                         |                         |                         | KO                      | E.R.: 0.019±0.00942                                  | E.R.: 0.019±0.00942                                           |                                                                                                                |                                                                                  |                                                                                 |
|                                                                 |                     |                                                                 |                         |                         |                         | neuron n=40 / mice n=5  | E.R.: 0.019±0.00942                                  | E.R.: 0.019±0.00942                                           |                                                                                                                |                                                                                  |                                                                                 |
|                                                                 |                     |                                                                 |                         |                         |                         | WT                      | E.R.: 0.019±0.00942                                  | E.R.: 0.019±0.00942                                           |                                                                                                                |                                                                                  |                                                                                 |
|                                                                 |                     |                                                                 |                         |                         |                         | KO                      | E.R.: 0.019±0.00942                                  | E.R.: 0.019±0.00942                                           |                                                                                                                |                                                                                  |                                                                                 |
|                                                                 |                     |                                                                 |                         |                         |                         | neuron n=40 / mice n=5  | E.R.: 0.019±0.00942                                  | E.R.: 0.019±0.00942                                           |                                                                                                                |                                                                                  |                                                                                 |
|                                                                 |                     | Empty WT-52                                                     | M                       | 12wks                   | mice n=5                | WT                      | E.R.: 0.019±0.00942                                  | E.R.: 0.019±0.00942                                           | Two Way ANOVA with Tukey's test<br>F(1, 10)=4.022                                                              | time 0.029<br>target0.021<br>interaction 0.042                                   | WT<br>E.R. vs. S.R. p=0.009<br>S.R. vs. S.R. p=0.009                            |
|                                                                 |                     |                                                                 |                         |                         |                         | Social WT-52            | E.R.: 0.019±0.00942                                  | E.R.: 0.019±0.00942                                           |                                                                                                                |                                                                                  |                                                                                 |
|                                                                 |                     |                                                                 |                         |                         |                         | Object WT-52            | E.R.: 0.019±0.00942                                  | E.R.: 0.019±0.00942                                           |                                                                                                                |                                                                                  |                                                                                 |
|                                                                 |                     |                                                                 |                         |                         |                         | Empty KO-53             | E.R.: 0.019±0.00942                                  | E.R.: 0.019±0.00942                                           |                                                                                                                |                                                                                  |                                                                                 |
|                                                                 |                     |                                                                 |                         |                         |                         | Social KO-53            | E.R.: 0.019±0.00942                                  | E.R.: 0.019±0.00942                                           |                                                                                                                |                                                                                  |                                                                                 |
|                                                                 |                     |                                                                 |                         |                         |                         | Object KO-53            | E.R.: 0.019±0.00942                                  | E.R.: 0.019±0.00942                                           |                                                                                                                |                                                                                  |                                                                                 |
| Empty WT-52                                                     | M                   | 12wks                                                           | mice n=5                | WT                      | E.R.: 0.019±0.00942     | E.R.: 0.019±0.00942     | Two Way ANOVA with Tukey's test<br>F(1, 102)=14.414  | time <0.001<br>target 0.146<br>interaction 0.533              | WT<br>E.R. vs. S.R. p=0.009<br>S.R. vs. S.R. p=0.009                                                           |                                                                                  |                                                                                 |
|                                                                 |                     |                                                                 |                         | Social WT-52            | E.R.: 0.019±0.00942     | E.R.: 0.019±0.00942     |                                                      |                                                               |                                                                                                                |                                                                                  |                                                                                 |
|                                                                 |                     |                                                                 |                         | Object WT-52            | E.R.: 0.019±0.00942     | E.R.: 0.019±0.00942     |                                                      |                                                               |                                                                                                                |                                                                                  |                                                                                 |
|                                                                 |                     |                                                                 |                         | Empty KO-53             | E.R.: 0.019±0.00942     | E.R.: 0.019±0.00942     |                                                      |                                                               |                                                                                                                |                                                                                  |                                                                                 |
|                                                                 |                     |                                                                 |                         | Social KO-53            | E.R.: 0.019±0.00942     | E.R.: 0.019±0.00942     |                                                      |                                                               |                                                                                                                |                                                                                  |                                                                                 |
|                                                                 |                     |                                                                 |                         | Object KO-53            | E.R.: 0.019±0.00942     | E.R.: 0.019±0.00942     |                                                      |                                                               |                                                                                                                |                                                                                  |                                                                                 |
| Empty WT-52                                                     | M                   | 12wks                                                           | mice n=5                | WT                      | E.R.: 0.019±0.00942     | E.R.: 0.019±0.00942     | Two Way ANOVA with Tukey's test<br>F(1, 10)=4.022    | time 0.449<br>target0.258<br>interaction 0.326                | WT<br>E.R. vs. S.R. p=0.009<br>S.R. vs. S.R. p=0.009                                                           |                                                                                  |                                                                                 |
|                                                                 |                     |                                                                 |                         | Social WT-52            | E.R.: 0.019±0.00942     | E.R.: 0.019±0.00942     |                                                      |                                                               |                                                                                                                |                                                                                  |                                                                                 |
|                                                                 |                     |                                                                 |                         | Object WT-52            | E.R.: 0.019±0.00942     | E.R.: 0.019±0.00942     |                                                      |                                                               |                                                                                                                |                                                                                  |                                                                                 |
|                                                                 |                     |                                                                 |                         | Empty KO-53             | E.R.: 0.019±0.00942     | E.R.: 0.019±0.00942     |                                                      |                                                               |                                                                                                                |                                                                                  |                                                                                 |
|                                                                 |                     |                                                                 |                         | Social KO-53            | E.R.: 0.019±0.00942     | E.R.: 0.019±0.00942     |                                                      |                                                               |                                                                                                                |                                                                                  |                                                                                 |
|                                                                 |                     |                                                                 |                         | Object KO-53            | E.R.: 0.019±0.00942     | E.R.: 0.019±0.00942     |                                                      |                                                               |                                                                                                                |                                                                                  |                                                                                 |
| Empty WT-52                                                     | M                   | 12wks                                                           | mice n=5                | WT                      | E.R.: 0.019±0.00942     | E.R.: 0.019±0.00942     | Two Way ANOVA with Tukey's test<br>F(1, 102)=14.22   | time 0.001<br>target 0.999<br>interaction 0.233               | WT<br>E.R. vs. S.R. p=0.009<br>S.R. vs. S.R. p=0.009                                                           |                                                                                  |                                                                                 |
|                                                                 |                     |                                                                 |                         | Social WT-52            | E.R.: 0.019±0.00942     | E.R.: 0.019±0.00942     |                                                      |                                                               |                                                                                                                |                                                                                  |                                                                                 |
|                                                                 |                     |                                                                 |                         | Object WT-52            | E.R.: 0.019±0.00942     | E.R.: 0.019±0.00942     |                                                      |                                                               |                                                                                                                |                                                                                  |                                                                                 |
|                                                                 |                     |                                                                 |                         | Empty KO-53             | E.R.: 0.019±0.00942     | E.R.: 0.019±0.00942     |                                                      |                                                               |                                                                                                                |                                                                                  |                                                                                 |
|                                                                 |                     |                                                                 |                         | Social KO-53            | E.R.: 0.019±0.00942     | E.R.: 0.019±0.00942     |                                                      |                                                               |                                                                                                                |                                                                                  |                                                                                 |
|                                                                 |                     |                                                                 |                         | Object KO-53            | E.R.: 0.019±0.00942     | E.R.: 0.019±0.00942     |                                                      |                                                               |                                                                                                                |                                                                                  |                                                                                 |



|                          |                                                      |                                            |   |        |                                                                                                                                                                |                                                       |                                                                        |                                                                           |                                                                                                                                 |                                                                        |
|--------------------------|------------------------------------------------------|--------------------------------------------|---|--------|----------------------------------------------------------------------------------------------------------------------------------------------------------------|-------------------------------------------------------|------------------------------------------------------------------------|---------------------------------------------------------------------------|---------------------------------------------------------------------------------------------------------------------------------|------------------------------------------------------------------------|
| Supplementary Figure 4c  | Linear Chamber                                       | WT pre-poop-Delta PSD                      | M | 12wks  | rice n=5                                                                                                                                                       | Empty WT-F02                                          | Pre-3 396e0 000346                                                     | Two Way ANOVA with Tukey's test<br>F(1,104)=4.848                         | time 0.032<br>target0.016<br>interaction 0.807                                                                                  | pre F vs s p=0.093                                                     |
|                          |                                                      | KD pre-poop-Delta PSD                      | M | 12wks  | rice n=5                                                                                                                                                       | Social WT-F02                                         | Pre-3 396e0 000346                                                     |                                                                           |                                                                                                                                 | post F vs s p=0.016                                                    |
| Supplementary Figure 5   | Immuno-Histochemistry                                | Density of P-tyrosine neurons              | M | >12wks | WT: 33 slices / 5mice<br>KD: 36 neurons / 5mice                                                                                                                | WT Cg1.9.13260.8355                                   | 7.421                                                                  | Mann Whitney, two-tailed                                                  | p=0.0556                                                                                                                        | ns                                                                     |
|                          |                                                      |                                            |   |        |                                                                                                                                                                | KD Cg1.4.6361.316                                     | 6.655 ± 1.951                                                          |                                                                           |                                                                                                                                 |                                                                        |
| Supplementary Figure 6a  | Slice electrophysiology with optogenetic stimulation | 10Hz optoStim (V-clamp) Stimulated PV      | M | 12wks  | WT (Binj) 11 neurons / 3 mice                                                                                                                                  | WT -2017 ± 528.3                                      | WT -2019 (-3892, -228.9)                                               | Mann Whitney test                                                         | p=0.6994                                                                                                                        | ns                                                                     |
|                          |                                                      | 10Hz optoStim (V-clamp) Stimulated PV      | M | 12wks  | WT (Binj) 11 neurons / 3 mice                                                                                                                                  | KD -2018 ± 385.1                                      | KD -2452 (-3817, -82.1)                                                |                                                                           |                                                                                                                                 |                                                                        |
| Supplementary Figure 6b  | Slice electrophysiology with optogenetic stimulation | 10Hz optoStim Neighboring PV Ratio diagram | M | 12wks  | WT (ACSF) 504 epochs / 10mice<br>KD (Synaptic blockers) 96 epochs / 3mice                                                                                      | Chi-square, df                                        | WT (ACSF): 451 (332, 21)                                               | Chi-square                                                                | p=0.2465                                                                                                                        | ns                                                                     |
|                          |                                                      | 10Hz optoStim Neighboring PV Ratio diagram | M | 12wks  | WT (ACSF) 456 epochs / 15mice<br>KD (Synaptic blockers) 96 epochs / 3mice                                                                                      | Chi-square, df                                        | KD (ACSF): 52 (111, 61)                                                |                                                                           |                                                                                                                                 |                                                                        |
| Supplementary Figure 8   | Slice electrophysiology with optogenetic stimulation | 10Hz optoStim Neighboring PV Firing rate   | M | 12wks  | WT (ACSF): 47 neurons / 10 mice<br>KD (ACSF): 42 neurons / 15 mice<br>WT (Synaptic blockers): 8 neurons / 3 mice<br>KD (Synaptic blockers): 8 neurons / 3 mice | WT (ACSF): 4.202 ± 0.901<br>KD (ACSF): 11.984 ± 1.491 | WT (Synaptic blockers): 0 (10.677, 0)<br>KD (ACSF): 10 (16.875, 6.667) | Two-way repeated measures of ANOVA with Sidak's multiple comparisons test | Interaction F (1, 101) = 0.0234P=0.8785<br>Drug F (1, 101) = 0.5079P=0.7948<br>Group F (1, 101) = 12.797*P=0.005                | ACSF - synaptic blockers<br>WT vs post (0.9883)<br>KD vs post (0.9477) |
|                          |                                                      | 10Hz optoStim Neighboring PV Ratio diagram | M | 12wks  | WT (10, 40, 80 Hz): 216 epochs / 4mice<br>KD (10, 40, 80 Hz): 252 epochs / 4mice                                                                               | Chi-square, df                                        | WT (10 Hz): 51 (175, 6)                                                |                                                                           |                                                                                                                                 |                                                                        |
| Supplementary Figure 10  | Sholl analysis                                       | Intersections                              | M | 10wks  | WT: 4 neurons / 3 mice                                                                                                                                         | WT 10 Hz: 5.990 ± 0.73                                | WT 10 Hz: 51 (175, 6)                                                  | Repeated measures of Two Way ANOVA                                        | Interaction F (40, 200) = 0.1183, P=0.9999;<br>Genotype F (1, 5) = 0.02754, P=0.8747;<br>Distance F (40, 200) = 26.26, P=0.0001 | WT                                                                     |
|                          |                                                      |                                            |   |        |                                                                                                                                                                | WT 40 Hz: 10.28 ± 3.260                               | WT 40 Hz: 0 (0, 18.91)                                                 |                                                                           |                                                                                                                                 |                                                                        |
| Supplementary Figure 11a | Slice electrophysiology with optogenetic stimulation | 10Hz optoStim Neighboring PV Ratio diagram | M | 12wks  | WT: 240 epochs / 4mice<br>WT+DCS: 240 epochs / 4mice                                                                                                           | Chi-square, df                                        | WT+DCS: 97 (135, 36)                                                   | Chi-square                                                                | p=0.1000                                                                                                                        | ns                                                                     |
|                          |                                                      | 10Hz optoStim Neighboring PV Ratio diagram | M | 12wks  | KD: 100 epochs / 4mice<br>KD+DCS: 100 epochs / 4mice                                                                                                           | Chi-square, df                                        | KD: 50 (100, 1)                                                        |                                                                           |                                                                                                                                 |                                                                        |
| Supplementary Figure 12  | Three chamber test with optogenetic stimulation      | WT social                                  | M | 12wks  | WT: 20 neurons / 4 mice<br>WT+DCS: 20 neurons / 4 mice<br>KD: 16 neurons / 4 mice<br>KD+DCS: 16 neurons / 4 mice                                               | WT: 22.571 ± 3.229                                    | WT: 21.694 (29.623, 12.025)                                            | Repeated two way ANOVA with Sidak's multiple comparison                   | Interaction F(6,104)=1.235 p=0.2991<br>light(1,97), 102.510 0.248 p=0.3742<br>opsin(F3,52)=2.008, p=0.1242                      | ns                                                                     |
|                          |                                                      |                                            |   |        |                                                                                                                                                                | WT+DCS: 26.124 ± 3.903                                | WT+DCS: 21.103 (38.392, 11.190)                                        |                                                                           |                                                                                                                                 |                                                                        |
| Supplementary Figure 12  | Three chamber test with optogenetic stimulation      | KD social                                  | M | 12wks  | WT: 20 neurons / 4 mice<br>WT+DCS: 20 neurons / 4 mice<br>KD: 16 neurons / 4 mice<br>KD+DCS: 16 neurons / 4 mice                                               | WT: 22.571 ± 3.229                                    | WT: 21.694 (29.623, 12.025)                                            | Repeated two way ANOVA with Sidak's multiple comparison                   | Interaction F(6,104)=1.235 p=0.2991<br>light(1,97), 102.510 0.248 p=0.3742<br>opsin(F3,52)=2.008, p=0.1242                      | ns                                                                     |
|                          |                                                      |                                            |   |        |                                                                                                                                                                | WT+DCS: 26.124 ± 3.903                                | WT+DCS: 21.103 (38.392, 11.190)                                        |                                                                           |                                                                                                                                 |                                                                        |
| Supplementary Figure 12  | Three chamber test with optogenetic stimulation      | WT object                                  | M | 12wks  | WT: 20 neurons / 4 mice<br>WT+DCS: 20 neurons / 4 mice<br>KD: 16 neurons / 4 mice<br>KD+DCS: 16 neurons / 4 mice                                               | WT: 22.571 ± 3.229                                    | WT: 21.694 (29.623, 12.025)                                            | Repeated two way ANOVA with Sidak's multiple comparison                   | Interaction F(6,104)=1.235 p=0.2991<br>light(1,97), 102.510 0.248 p=0.3742<br>opsin(F3,52)=2.008, p=0.1242                      | ns                                                                     |
|                          |                                                      |                                            |   |        |                                                                                                                                                                | WT+DCS: 26.124 ± 3.903                                | WT+DCS: 21.103 (38.392, 11.190)                                        |                                                                           |                                                                                                                                 |                                                                        |
| Supplementary Figure 12  | Three chamber test with optogenetic stimulation      | KD object                                  | M | 12wks  | WT: 20 neurons / 4 mice<br>WT+DCS: 20 neurons / 4 mice<br>KD: 16 neurons / 4 mice<br>KD+DCS: 16 neurons / 4 mice                                               | WT: 22.571 ± 3.229                                    | WT: 21.694 (29.623, 12.025)                                            | Repeated two way ANOVA with Sidak's multiple comparison                   | Interaction F(6,104)=1.235 p=0.2991<br>light(1,97), 102.510 0.248 p=0.3742<br>opsin(F3,52)=2.008, p=0.1242                      | ns                                                                     |
|                          |                                                      |                                            |   |        |                                                                                                                                                                | WT+DCS: 26.124 ± 3.903                                | WT+DCS: 21.103 (38.392, 11.190)                                        |                                                                           |                                                                                                                                 |                                                                        |

|                            |                                                 |          |        |                                  |                       |                                                     |                                                                           |                                                                        |
|----------------------------|-------------------------------------------------|----------|--------|----------------------------------|-----------------------|-----------------------------------------------------|---------------------------------------------------------------------------|------------------------------------------------------------------------|
| Supplementary Figure 13a-d | Open field test with optogenetic stimulation    | 12-19wks | M      | WT EYFP n=12 Chr2n=16            | 1.off                 | EYFP 14874158.8                                     | Repeated measures of Two Way ANOVA with Bonferroni's test F(1,104)=2140   | time <0.0001<br>virus 0.4969<br>interaction 0.0003<br>matching <0.0001 |
|                            |                                                 |          |        |                                  | 2.on                  | Chr2 1780481131.0                                   |                                                                           |                                                                        |
|                            |                                                 |          |        |                                  | 3.off                 | EYFP 15214151.1                                     |                                                                           |                                                                        |
|                            |                                                 |          |        |                                  | 4.on                  | Chr2 134291223.0                                    |                                                                           |                                                                        |
|                            |                                                 |          |        |                                  | 5.off                 | EYFP 102141223.3                                    |                                                                           |                                                                        |
|                            |                                                 |          |        | KO EYFP n=12 Chr2n=9             | 1.off                 | EYFP 34342417.7                                     | Repeated measures of Two Way ANOVA with Bonferroni's test F(1,104)=0.3451 | time 0.0077<br>virus 0.4748<br>interaction 0.7917<br>matching <0.0001  |
|                            |                                                 |          |        |                                  | 2.on                  | Chr2 33214204.8                                     |                                                                           |                                                                        |
|                            |                                                 |          |        |                                  | 3.off                 | EYFP 3621475.1                                      |                                                                           |                                                                        |
|                            |                                                 |          |        |                                  | 4.on                  | Chr2 28744464.4                                     |                                                                           |                                                                        |
|                            |                                                 |          |        |                                  | 5.off                 | EYFP 35244495.1                                     |                                                                           |                                                                        |
|                            |                                                 |          |        | WT EYFP n=12 Chr2n=16            | 1.off                 | EYFP 8 88611 703                                    | Repeated measures of Two Way ANOVA with Bonferroni's test F(1,104)=1.027  | time 0.4078<br>virus 0.8759<br>interaction 0.6356<br>matching <0.0001  |
|                            |                                                 |          |        |                                  | 2.on                  | Chr2 9 4502 258                                     |                                                                           |                                                                        |
|                            |                                                 |          |        |                                  | 3.off                 | EYFP 9 4502 258                                     |                                                                           |                                                                        |
|                            |                                                 |          |        |                                  | 4.on                  | Chr2 7 4462 449                                     |                                                                           |                                                                        |
|                            |                                                 |          |        |                                  | 5.off                 | EYFP 7 2524 900                                     |                                                                           |                                                                        |
|                            |                                                 |          |        | KO EYFP n=12 Chr2n=9             | 1.off                 | EYFP 18 1622 244                                    | Repeated measures of Two Way ANOVA with Bonferroni's test F(1,104)=0.3485 | time 0.4405<br>virus 0.9983<br>interaction 0.7003<br>matching <0.0001  |
|                            |                                                 |          |        |                                  | 2.on                  | Chr2 14 8115 34                                     |                                                                           |                                                                        |
|                            |                                                 |          |        |                                  | 3.off                 | EYFP 11 8113 141                                    |                                                                           |                                                                        |
|                            |                                                 |          |        |                                  | 4.on                  | Chr2 12 2622 266                                    |                                                                           |                                                                        |
|                            |                                                 |          |        |                                  | 5.off                 | EYFP 14 2242 373                                    |                                                                           |                                                                        |
| Supplementary Figure 13e   | Three chamber test with optogenetic stimulation | M        | >12wks | n=9                              | Social 120.9417.14    | Unpaired t test, two-tailed                         | p=0.0395                                                                  | *                                                                      |
|                            |                                                 |          |        | n=6                              | Object 73.4611.96     |                                                     |                                                                           |                                                                        |
| Supplementary Figure 13f   | n=6 recording with optogenetic stimulation      | M        | >12wks | n=28                             | Object 73.4611.96     | Unpaired t test, two-tailed                         | p=0.0975                                                                  | ns                                                                     |
|                            |                                                 |          |        | n=21                             | Social 120.9417.14    |                                                     |                                                                           |                                                                        |
| Supplementary Figure 13g   | n=6 recording with optogenetic stimulation      | M        | >12wks | n=194/7                          | DE 2.5692 4560        | Wilcoxon matched-pairs signed rank test, two-tailed | p=0.4117                                                                  | ns                                                                     |
|                            |                                                 |          |        | n=72/8                           | DE 2.5692 4560        |                                                     |                                                                           |                                                                        |
| Supplementary Figure 13h   | Western blotting                                | HEK293T  | >12wks | n=3                              | Control 140.1285      | Ordinary one-way ANOVA                              | 0.0886                                                                    | ns                                                                     |
|                            |                                                 |          |        | n=3                              | Control 140.1285      |                                                     |                                                                           |                                                                        |
| Supplementary Figure 13i   | Openfield                                       | M        | >12wks | Control: n=9<br>Knockdown: n=9   | Control 148.148.53    | Unpaired t test, two-tailed                         | 0.7955                                                                    | ns                                                                     |
|                            |                                                 |          |        |                                  | Knockdown 148.148.53  |                                                     |                                                                           |                                                                        |
|                            |                                                 |          |        |                                  | Control 217.5620.9    |                                                     |                                                                           |                                                                        |
|                            |                                                 |          |        |                                  | Knockdown 217.5620.9  |                                                     |                                                                           |                                                                        |
|                            | Openfield                                       | M        | >10wks | Control: n=10<br>Knockdown: n=10 | Control 143.147.337   | Unpaired t test, two-tailed                         | 0.7753                                                                    | ns                                                                     |
|                            |                                                 |          |        |                                  | Knockdown 143.147.337 |                                                     |                                                                           |                                                                        |
|                            |                                                 |          |        |                                  | Control 249.2431.42   |                                                     |                                                                           |                                                                        |
|                            |                                                 |          |        |                                  | Knockdown 249.2431.42 |                                                     |                                                                           |                                                                        |

## Supplementary Table 2. Intrinsic properties of pyramidal neurons and Pv neurons in WT and Shank2-KO neurons.

Comparable intrinsic properties in WT and *Shank2*<sup>-/-</sup> pyramidal and Pv neurons in the mPFC (> 12 weeks). Pv neurons were marked by Chr2-EYFP expression. IR, input resistance; AP, action potential, FWHM, full width at half maximum, AHP, after hyperpolarization, ISI, inter-spike interval. Data: mean  $\pm$  SEM. (n = 21 neurons from 5 mice [WT-PN/pyramidal neurons], 13/5 [KO-PN], 24/6 [WT-Pv], and 16/4 [KO-Pv], ns, not significant, Student's t-test).

| Property                   | WT Py<br>(n=21)     | KO Py<br>(n=13)    | Statistics | WT Pv<br>(n=24)      | KO Pv<br>(n=19)      | Statistics | Stat method       |                   |
|----------------------------|---------------------|--------------------|------------|----------------------|----------------------|------------|-------------------|-------------------|
|                            |                     |                    |            |                      |                      |            | Py (WT vs. KO)    | Pv (WT vs. KO)    |
| IR (passive) (M $\Omega$ ) | 75.23 $\pm$ 5.914   | 73.90 $\pm$ 8.765  | p=0.9165   | 74.87 $\pm$ 2.452    | 78.50 $\pm$ 1.865    | p=0.5012   | Mann-Whitney test | Mann-Whitney test |
| Sag (mV)                   | 20.44 $\pm$ 0.9932  | 21.69 $\pm$ 1.626  | p=0.4894   | 24.44 $\pm$ 1.168    | 26.06 $\pm$ 0.9098   | p=0.0893   | Unpaired t-test   | Mann-Whitney test |
| AP threshold (mV)          | -42.73 $\pm$ 1.770  | -38.70 $\pm$ 1.535 | p=0.2608   | -38.73 $\pm$ 1.083   | -39.24 $\pm$ 2.107   | p=0.6240   | Mann-Whitney test | Mann-Whitney test |
| AP amplitude (mV)          | 69.71 $\pm$ 1.604   | 71.30 $\pm$ 3.112  | p=0.5817   | 47.97 $\pm$ 1.639    | 48.50 $\pm$ 1.629    | p=0.8245   | Mann-Whitney test | Unpaired t-test   |
| FWHM (ms)                  | 1.309 $\pm$ 0.05330 | 1.445 $\pm$ 0.1185 | p=0.2431   | 0.7982 $\pm$ 0.02326 | 0.8608 $\pm$ 0.07486 | p=0.9133   | Unpaired t-test   | Mann-Whitney test |
| AHP (mV) <sup>a</sup>      | 12.28 $\pm$ 0.8922  | 10.21 $\pm$ 1.354  | p=0.3955   | 15.86 $\pm$ 0.9857   | 17.13 $\pm$ 1.484    | p=0.6896   | Mann-Whitney test | Mann-Whitney test |
| Rheobase (pA)              | 135.7 $\pm$ 10.99   | 150.0 $\pm$ 30.56  | p=0.6160   | 239.6 $\pm$ 15.92    | 181.6 $\pm$ 17.61    | p=0.0616   | Mann-Whitney test | Unpaired t-test   |
| ISI ratio                  | 4.225 $\pm$ 0.3090  | 3.746 $\pm$ 0.5036 | p=0.3963   | 1.307 $\pm$ 0.02791  | 1.933 $\pm$ 0.4037   | p=0.3255   | Unpaired t-test   | Mann-Whitney test |

## References

1. Lee, E., *et al.* Enhanced Neuronal Activity in the Medial Prefrontal Cortex during Social Approach Behavior. *J Neurosci* **36**, 6926-6936 (2016).
2. Latimer, K.W., Yates, J.L., Meister, M.L., Huk, A.C. & Pillow, J.W. NEURONAL MODELING. Single-trial spike trains in parietal cortex reveal discrete steps during decision-making. *Science* **349**, 184-187 (2015).
3. Rudy, B., Fishell, G., Lee, S. & Hjerling-Leffler, J. Three groups of interneurons account for nearly 100% of neocortical GABAergic neurons. *Dev Neurobiol* **71**, 45-61 (2011).
